# Supplementary material for: Oncogenic enhancers drive esophageal squamous cell carcinogenesis and metastasis
Source: PubMed Central journal article supplement (PMC8298514; doi:10.1038/s41467-021-24813-2), 2021-07-22
Supplement: 41467_2021_24813_MOESM1_ESM.pdf [file 41467_2021_24813_MOESM1_ESM.pdf]

**a**

| No. | Type | Tumor Size (cm) | Stage | LNC location                                                                                                 | RNA-seq    | ChIP-seq   |
|-----|------|-----------------|-------|--------------------------------------------------------------------------------------------------------------|------------|------------|
| 2   | ESCC | 7.5×4×3         | IV    | Mid-paesoophageal; Right recurrent laryngeal nerve; Para-Cardia                                              | √          | -          |
| 3   | ESCC | 7×5×1.5         | III   | Paragastric; Mid-paesoophageal                                                                               | √          | -          |
| 4   | ESCC | 9×5×3           | IV    | Right recurrent laryngeal nerve                                                                              | √          | -          |
| 5   | ESCC | 4.5×3.5×1.5     | III   | Left recurrent laryngeal nerve                                                                               | √          | -          |
| 6   | ESCC | 5.6×3.8×2.7     | IV    | Right/left recurrent laryngeal nerve                                                                         | √          | -          |
| 7   | ESCC | 2.2×2.1×1.8     | III   | -                                                                                                            | √ (no LNC) | √ (no LNC) |
| 8   | ESCC | 3×2×1.5         | III   | Left recurrent laryngeal nerve                                                                               | √          | -          |
| 9   | ESCC | 3×3×2.5         | III   | -                                                                                                            | √(no LNC)  | -          |
| 10  | ESCC | 4.2×3×1.5       | IV    | Paragastric; Lower-paesoophageal; Left recurrent laryngeal nerve; Left principal bronchus                    | √          | √          |
| 11  | ESCC | 3×1.5×0.3       | III   | Left/right recurrent laryngeal nerve; Left supraclavicular                                                   | √          | √          |
| 12  | ESCC | 5×3.5×1.5       | IV    | Upper/mid/lower-paesoophageal; Left recurrent laryngeal nerve; Left principal bronchus                       | √          | √          |
| 13  | ESCC | 2.4×2×1.3       | III   | Left recurrent laryngeal nerve; Left/right principal bronchus                                                | √          | √          |
| 14  | ESCC | 8.5×3×1.5       | IV    | Right/left recurrent laryngeal nerve; Left/right principal bronchus; Upper-paesoophageal; Para-thoracic duct | √          | √          |
| 17  | ESCC | 5×3×2           | III   | -                                                                                                            | √ (no LNC) | √ (no LNC) |
| 18  | ESCC | 2.5×2×1.2       | III   | Right recurrent laryngeal nerve                                                                              | √ (no LNC) | -          |
| 19  | ESCC | 5.5×3.5×1.5     | IV    | Right recurrent laryngeal nerve                                                                              | √          | √          |
| 20  | ESCC | 4.5×4.4×3       | IV    | Upper/lower-paesoophageal; Right recurrent laryngeal nerve                                                   | √          | √          |
| 21  | ESCC | 3.6×2.5×1.1     | III   | Upper-paesoophageal; Right recurrent laryngeal nerve                                                         | √          | √          |

**b**

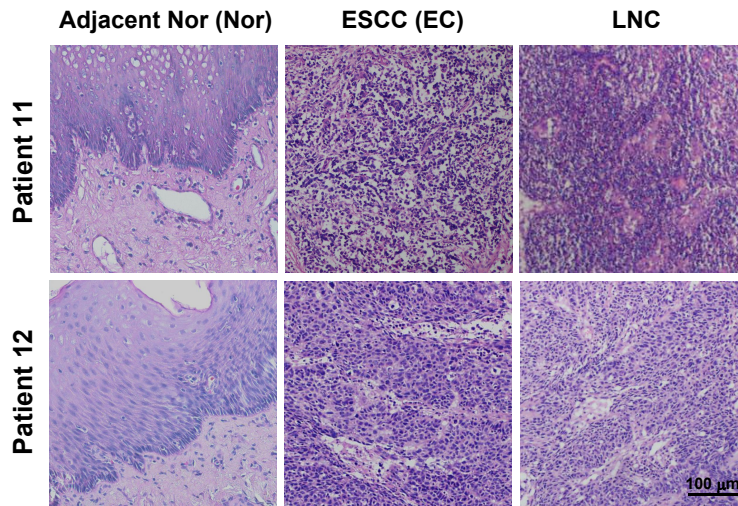

**Supplementary Figure 1. The clinical data for esophageal cancer patients.**

- a. The clinical data for cancer patients in the present study. All patients were numbered, and No. 1, 15, and 16 patients were excluded because of low tumor cell purity in pathological detection.
- b. Clinical H&E staining results for two representative patients.



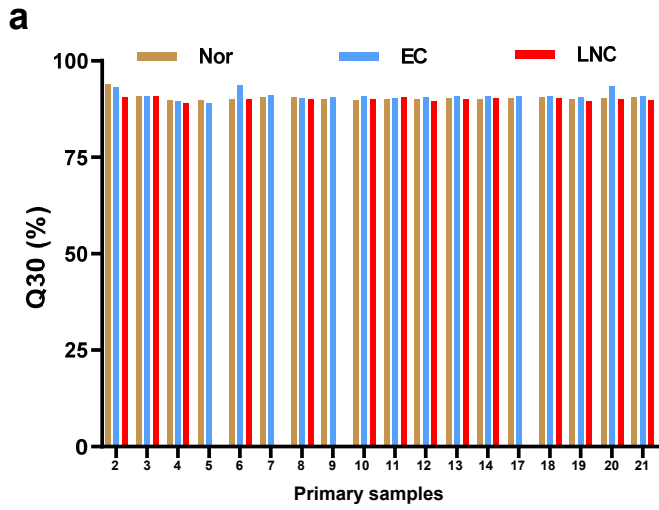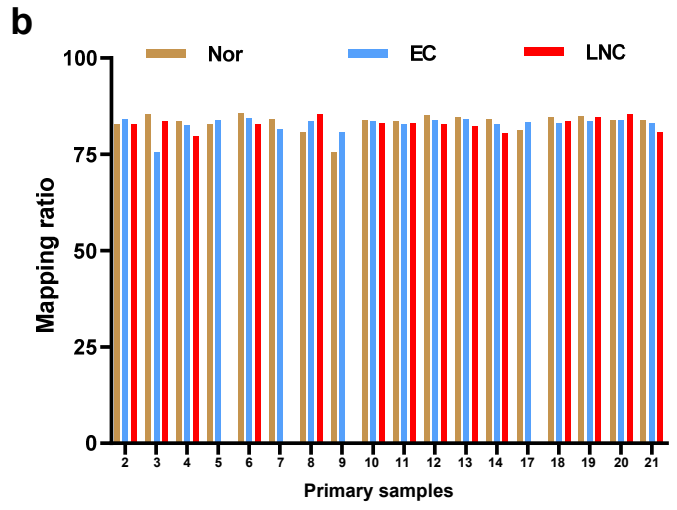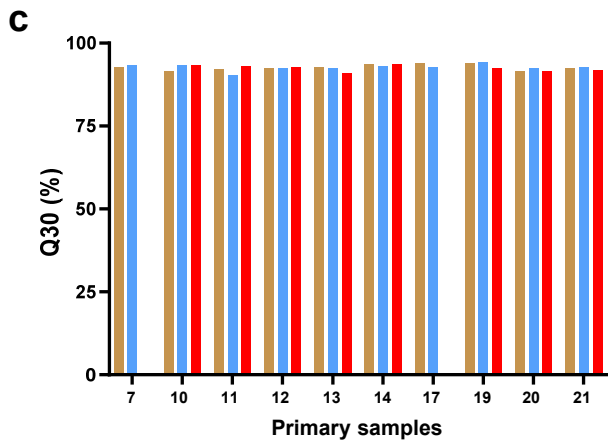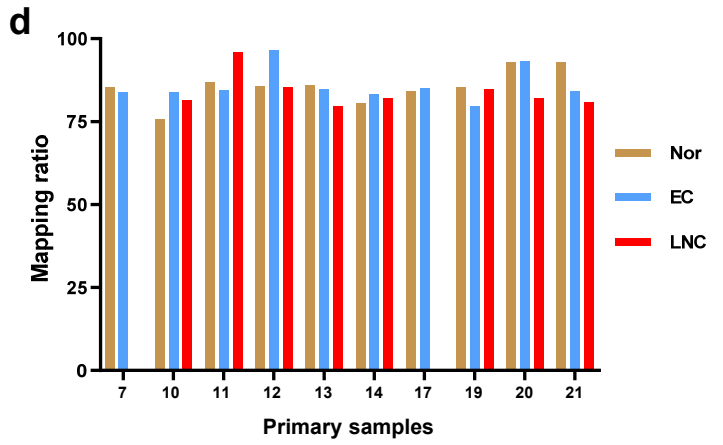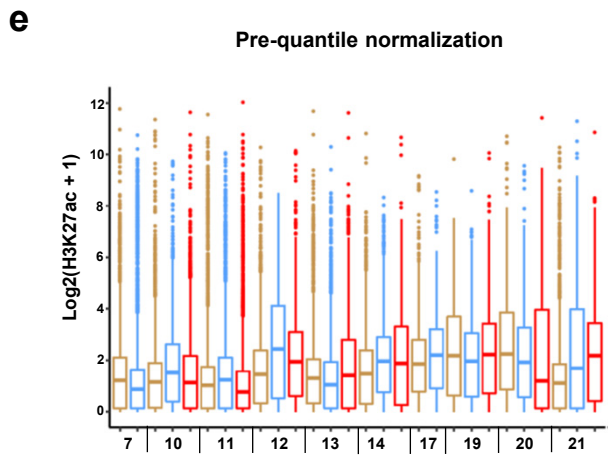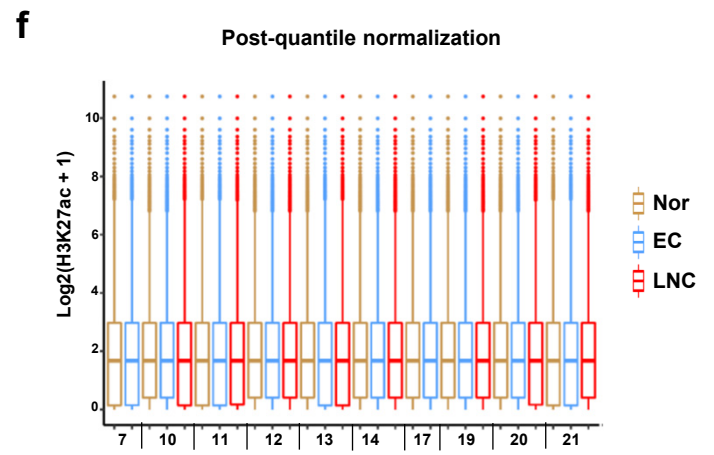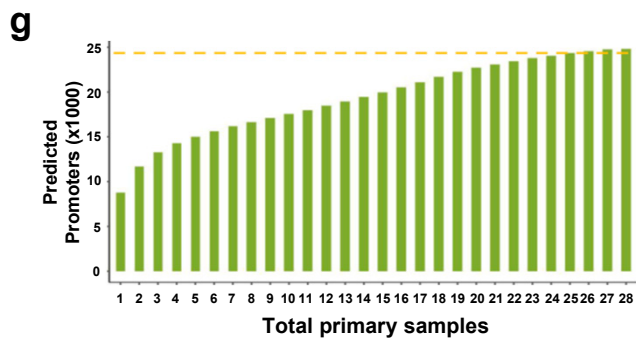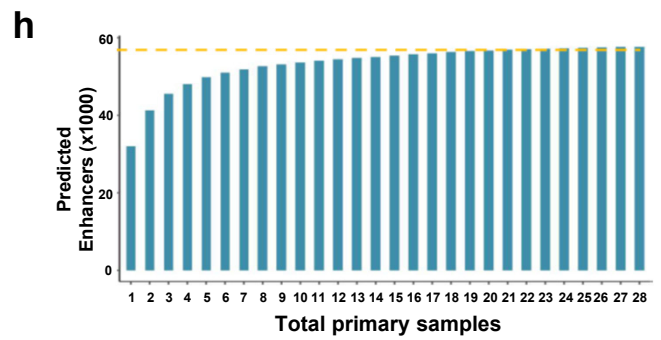

**Supplementary Figure 2. ChIP-seq and RNA-seq data quality control.**

- a. Percentage of RNA-seq reads for which all bases have scores  $> Q30$  (this is equivalent to the base-call accuracy = 99.9%).
- b. Mapping ratio for RNA-seq data.
- c. Percentage of ChIP-seq reads for which all bases have scores  $> Q30$ .
- d. Mapping ratio for ChIP-seq data.
- e. Box plots of H3K27ac enhancer profiles (57,675 enhancer loci evaluated per sample) before quantile normalization for Nor, EC, and LNC samples (28 independent samples).
- f. Box plots of H3K27ac enhancers after quantile normalization. e-f, Box plots are shown with the center (median), upper, and lower quartile range per sample, and thick lines indicate the median values. The whiskers indicate 1.5 IQR and the points indicates values that are bigger than 1.5 IQR.
- g-h. Saturation analysis shows the numbers of predicted promoter elements (g) and enhancers (h) across increasing number of primary samples. The yellow dotted lines indicate the total number of predicted regulatory elements by integrating 28 ChIP-seq profiles. Source data are provided as a Source Data file.

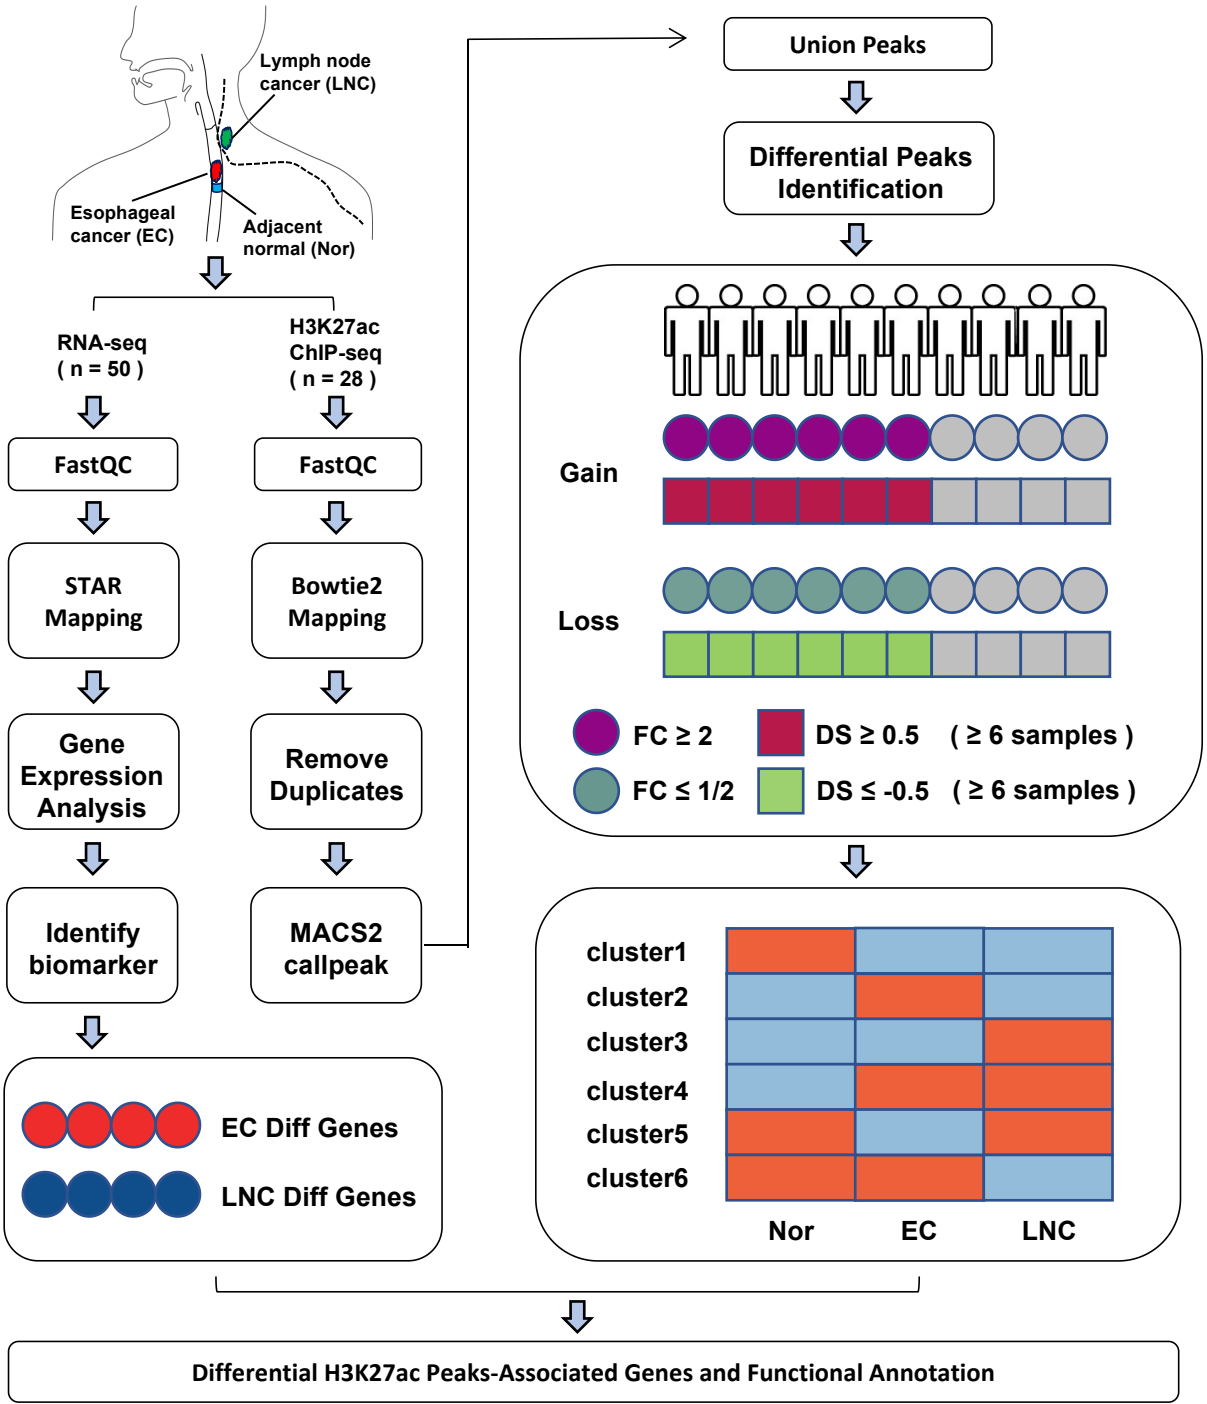

**Supplementary Figure 3. Diagram for experimental and bioinformatic procedures.**

Briefly, 50 RNA-seq profiles were generated from 18 paired patients, and 28 H3K27ac ChIP-seq profiles were generated from 10 paired patients. After regular quality control and processing, RNA-seq data were subjected to gene expression analysis, Differential Expression Gene Analysis (EC Diff genes: EC vs. Nor; LNC Diff genes: LNC vs. Nor), and biomarker analysis; ChIP-seq data were subjected to differential peak identification (promoter elements and enhancers), including *cis*-regulatory element gain and loss between two groups of samples (EC vs. Nor, LNC vs. Nor, and LNC vs. EC). Then, these differential enhancers were subjected to unsupervised hierarchical clustering, and 6 clusters (G1-G6) of differential enhancers were generated (as shown in Figure 1b). Diff, differential; FC, fold change. DS, differential signal.

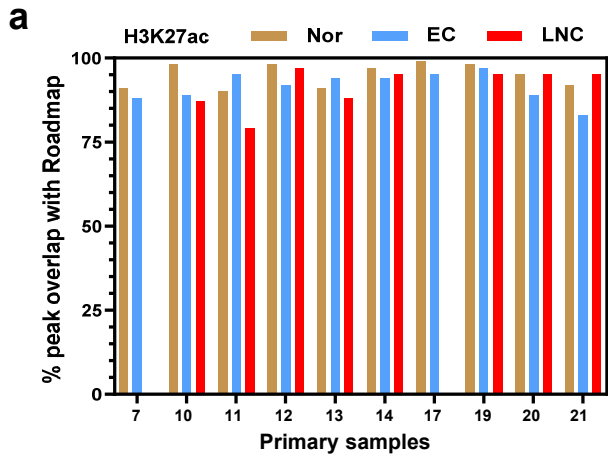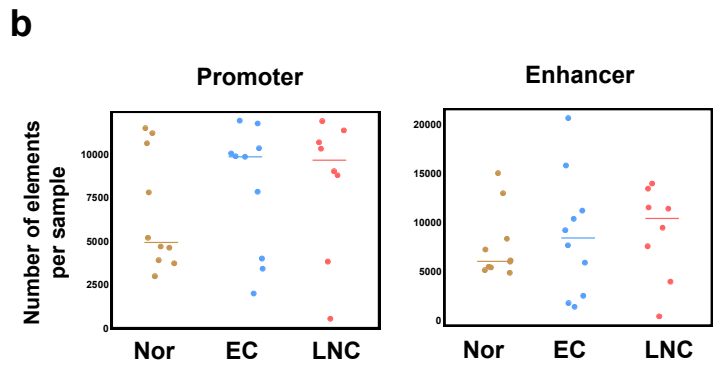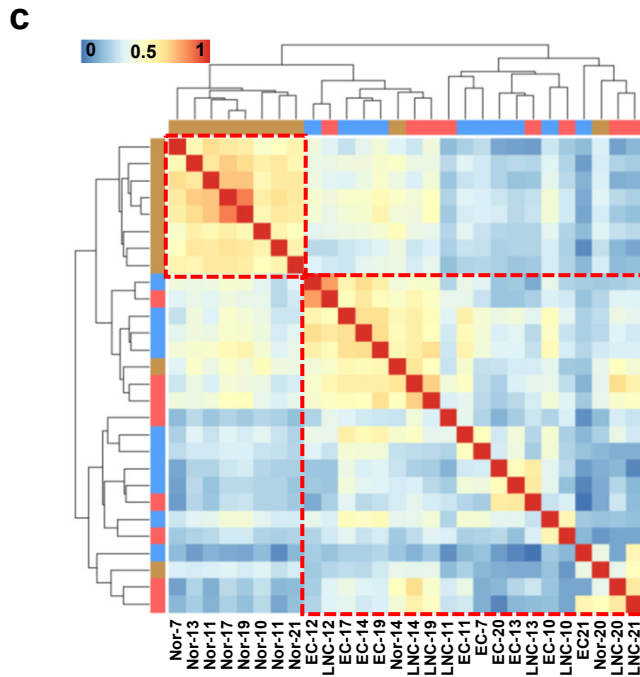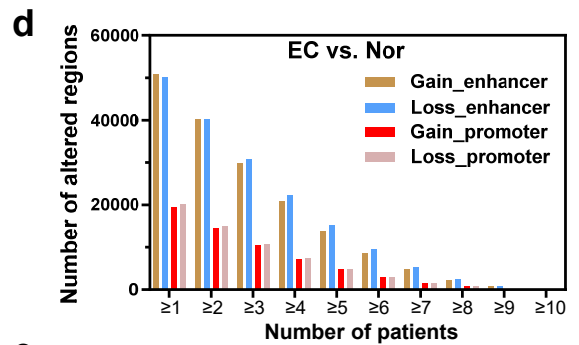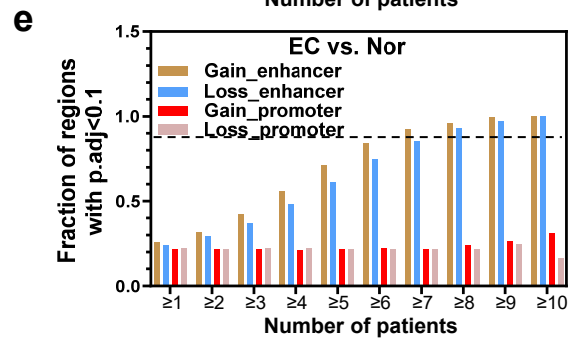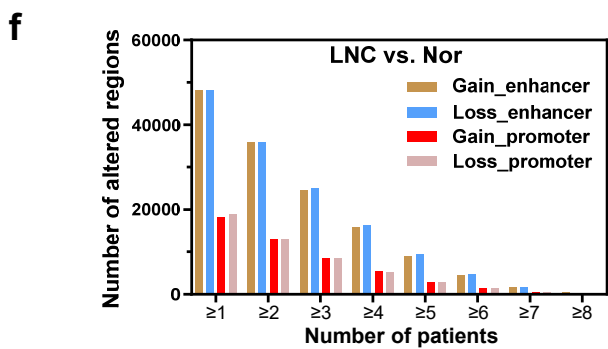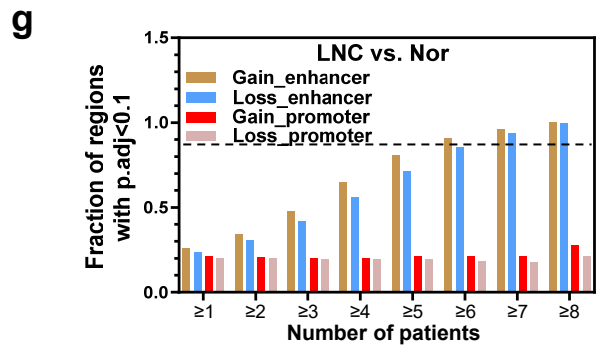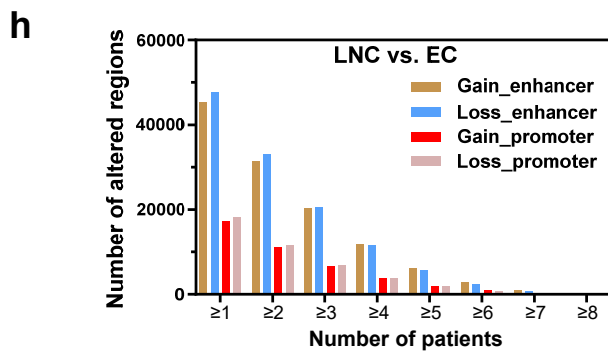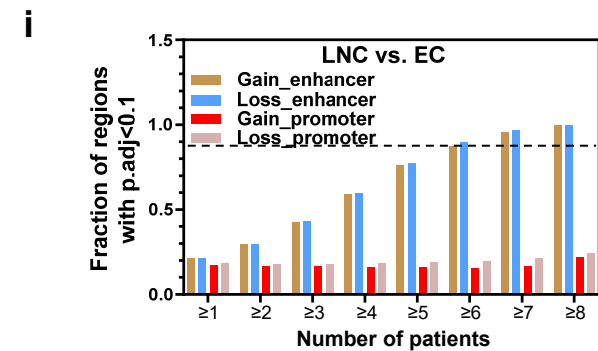

#### **Supplementary Figure 4. Enhancer supporting data.**

- a. Percentage of H3K27ac peaks across 28 profiles overlapping with H3K27ac peaks from normal esophageal tissues (Epigenome Roadmap; GSM1013127 and GSM906393).
- b. Number of promoter elements and enhancers across 28 H3K27ac profiles. Lines indicate the mean values.
- c. Unsupervised hierarchical clustering of all enhancers with H3K27ac signal across Nor, EC, and LNC samples. Nor can be generally separated from EC and LNC.
- d-i. Number of altered promoter elements and enhancers at different cut-offs of recurrence for different comparisons (d: EC vs. Nor; f: LNC vs. Nor; h: LNC vs. EC). The fraction of altered elements (e, g, i) that meet statistical significance defined by paired *t*-tests (one-tailed) with Benjamini-Hochberg correction ( $p_{adj} < 0.1$ ) at different cut-offs of recurrence. At the threshold of  $\geq 6/10$  patients, 80% of the altered regions achieved statistical significance. Source data are provided as a Source Data file.

**a**

| Regions  | Definition             | Total  | Relative to Nor          |                        |                           |                         | Relative to EC            |                         |
|----------|------------------------|--------|--------------------------|------------------------|---------------------------|-------------------------|---------------------------|-------------------------|
|          |                        |        | Recurrently gained in EC | Recurrently lost in EC | Recurrently gained in LNC | Recurrently lost in LNC | Recurrently gained in LNC | Recurrently lost in LNC |
| Promoter | H3K27ac+/<br>±2 kb TSS | 24,823 | 2,917                    | 3,027                  | 1,471                     | 1,403                   | 864                       | 715                     |
| Enhancer | H3K27ac+/<br>promoter- | 57,675 | 8,587                    | 9,642                  | 4,399                     | 4,624                   | 2,733                     | 2,466                   |

 $p < 1e-9$ **b**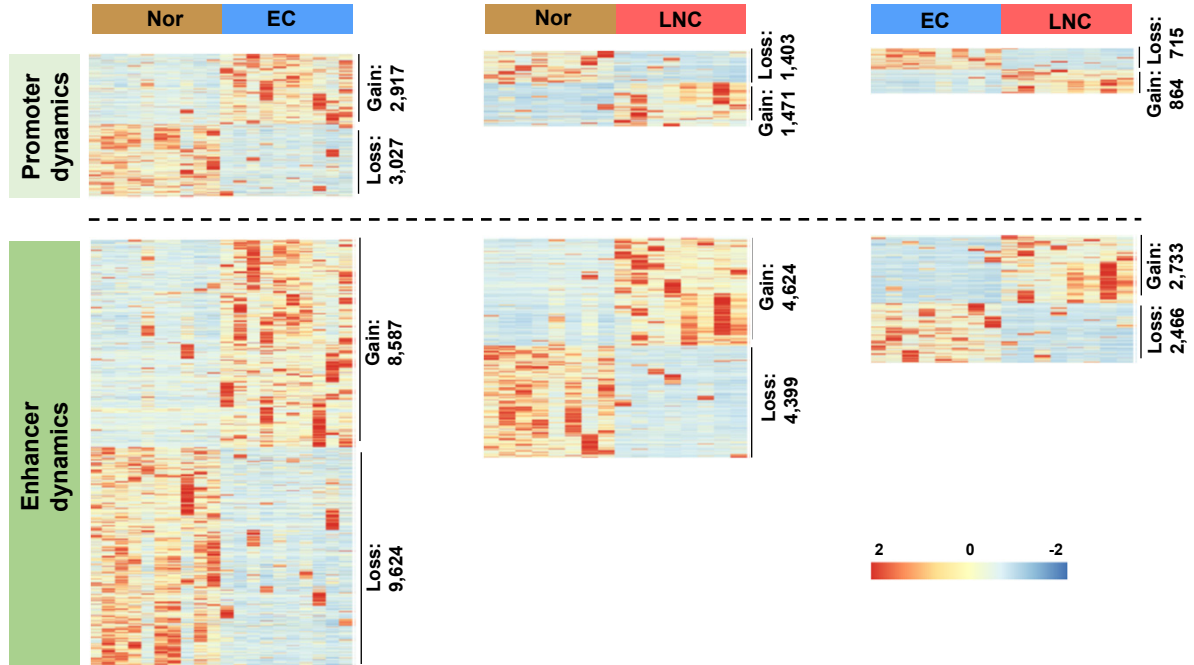**c**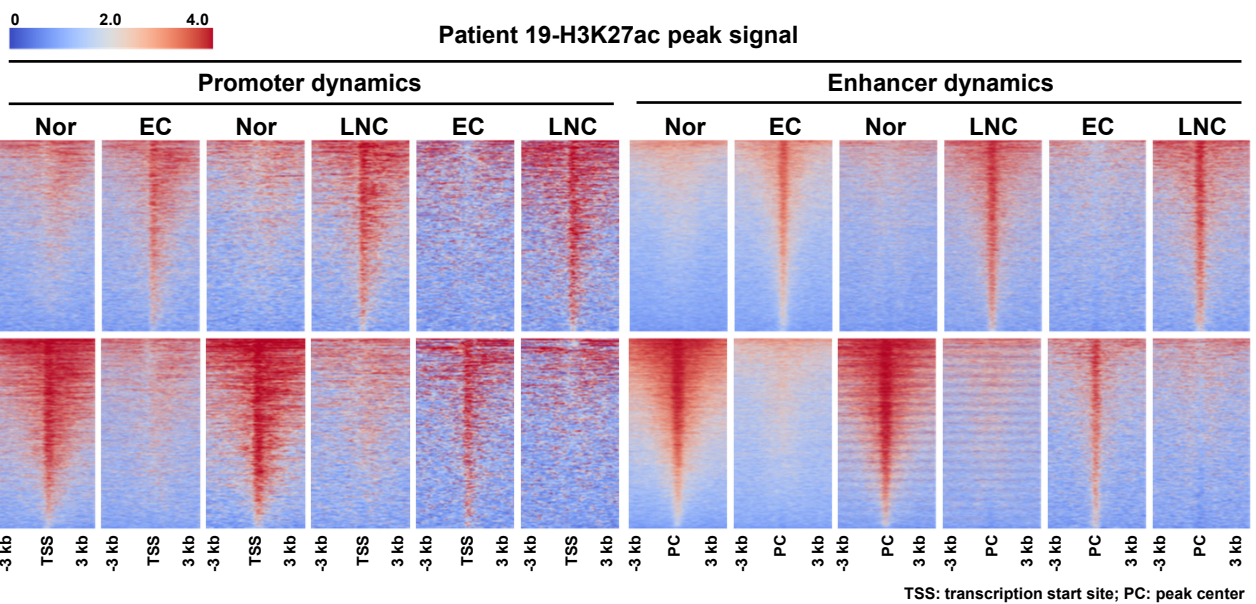**d**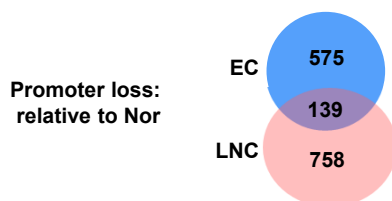**e**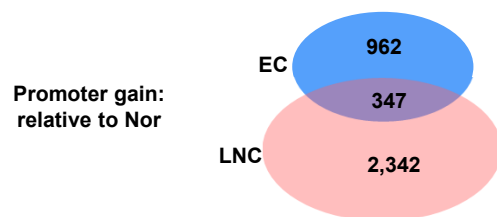

**Supplementary Figure 5. Differential promoter and enhancer analysis.**

a. Number of the total, recurrently gained, and recurrently lost promoter elements and enhancers in EC or LNC relative to Nor, as well as number of recurrently gained and lost promoter elements and enhancers in LNC relative to EC. Putative active promoter elements were defined by H3K27ac occupancy and proximity to TSS within 2 kb. Putative active enhancers are defined by the presence of H3K27ac exclusive with promoters.

b. Heatmap showing the gained and lost promoter elements and enhancers listed in a.

c. Representative heat maps showed H3K27ac levels of altered promoter elements and enhancers in a set of paired samples from a representative patient (patient 19: EC vs. Nor, LNC vs. EC, and LNC vs. EC). Each line represents a peak and neighboring 6 kb. TSSs were shown as the center for promoter dynamics and peak centers were shown as the centers of altered enhancer regions.

d-e. Venn diagram showing the overlapping number of lost (d) or gained (e) promoter elements relative to Nor.



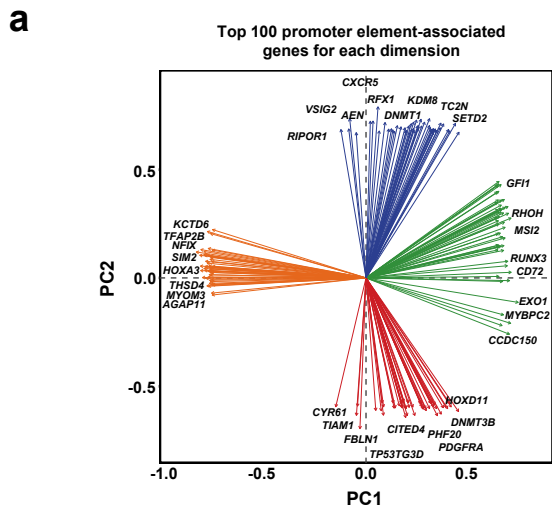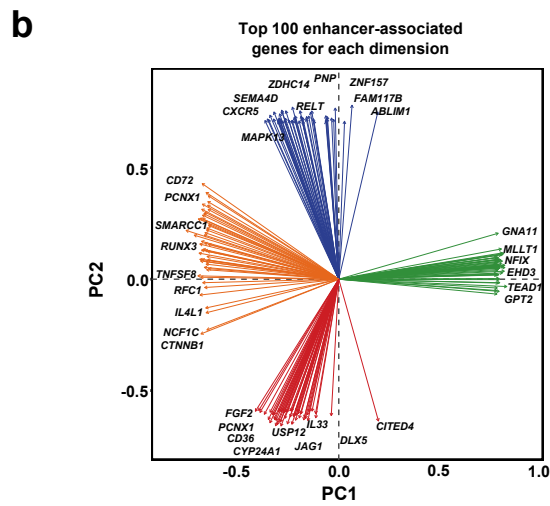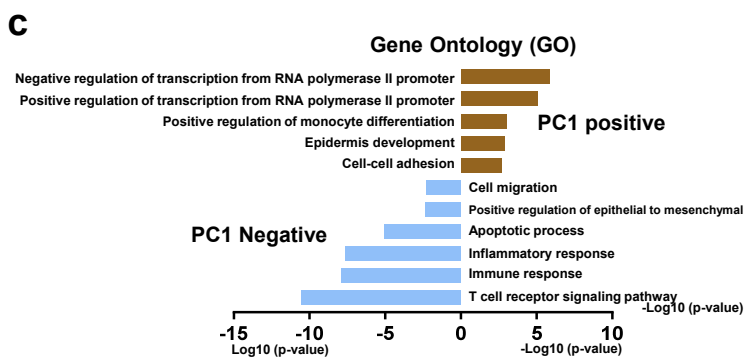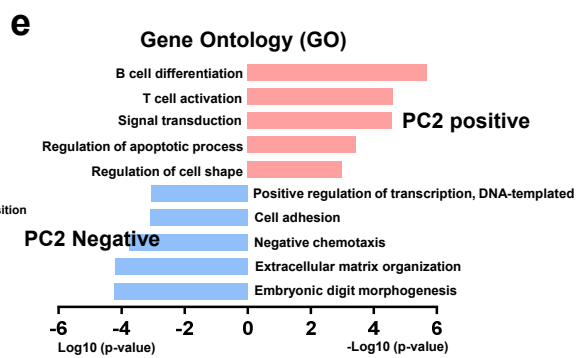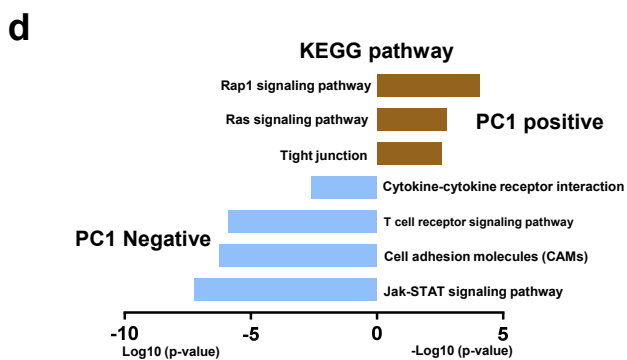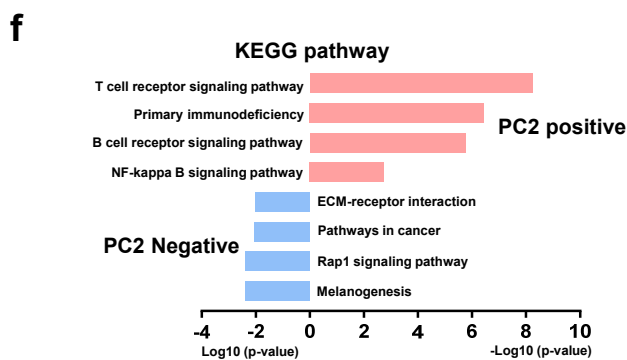

**g**

| Regions        | Definition             | Total | Relative to Nor          |                        |                           | Relative to EC          |                           |                         |
|----------------|------------------------|-------|--------------------------|------------------------|---------------------------|-------------------------|---------------------------|-------------------------|
|                |                        |       | Recurrently gained in EC | Recurrently lost in EC | Recurrently gained in LNC | Recurrently lost in LNC | Recurrently gained in LNC | Recurrently lost in LNC |
| Super enhancer | H3K27ac+/<br>promoter- | 1,042 | 436                      | 481                    | 427                       | 310                     | 437                       | 217                     |

Identification of SEs for each group based on the mean signal:  
 SE gain: the average diff\_signal of all samples > 0, and gained in 5/10 (8)  
 SE loss: the average diff\_signal of all samples < 0, and lost in 5/10 (8)

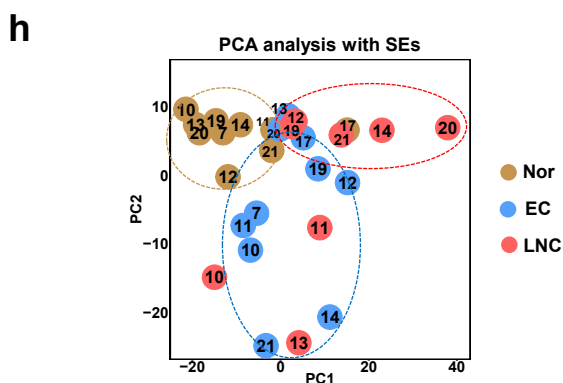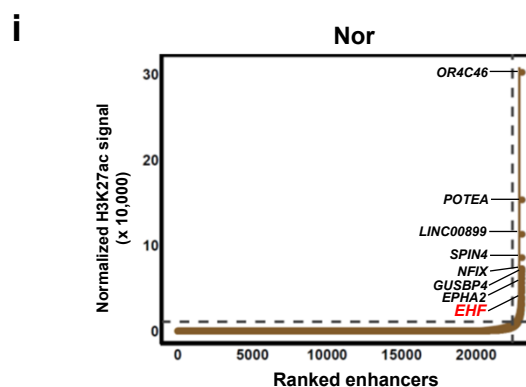

**Supplementary Figure 6. Supplemental data for analysis of enhancers and super-enhancers.**

- a. The top 100 (50 positive and 50 negative) promoter element-associated genes for each dimension and highlighted genes were presented in PCA analysis.
- b. The top 100 (50 positive and 50 negative) enhancer-associated genes for each dimension and highlighted genes were presented in PCA analysis.
- c-f. The top 1,000 enhancer-associated genes for each dimension (PC1 positive, PC1 negative, PC2 positive, and PC2 negative) were subjected to Gene Ontology (GO) (c and e) and KEGG pathway (d and f) analysis.
- g. Number of the total, recurrently gained, lost super-enhancers in EC or LNC relative to Nor, as well as number of recurrently gained and lost super-enhancers in LNC relative to EC. Super-enhancers (SEs) were identified for each group based on the mean signals. The gained SEs were defined according to the criteria: the average difference signal of all samples  $> 0$ , and absolute difference  $> 0$  in at least 5 patients (gained in 5/10 or 5/8); the lost SEs were defined according to the criteria: the average difference signal of all samples  $< 0$ , and absolute difference  $< 0$  in at least 5 patients (lost in 5/10 or 5/8).
- h. PCA analysis of 28 Nor, EC, and LNC samples using all super-enhancers.
- i. Identification of super-enhancers in Nor samples and top super-enhancer-associated genes. Source data are provided as a Source Data file.

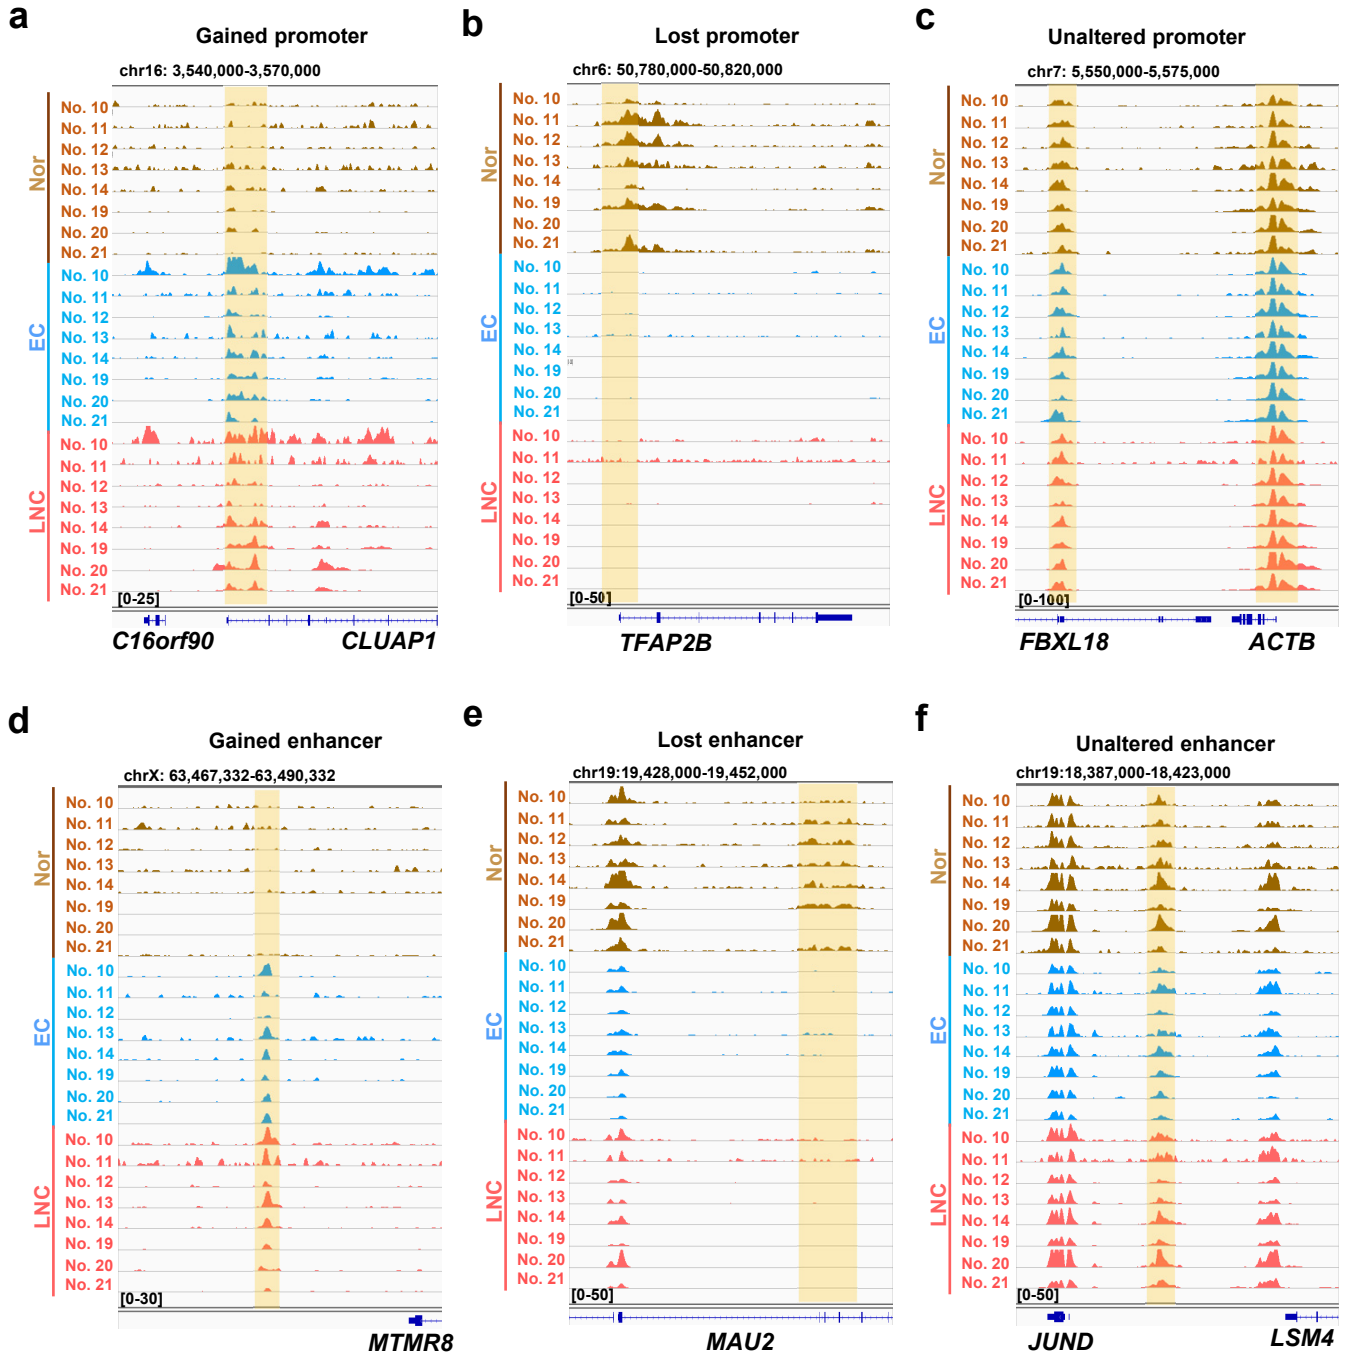

**Supplementary Figure 7. Examples for altered elements.**

a-f. Examples for gained promoter elements (c), lost promoter elements (b), gained enhancers (d), and lost enhancers (e). Randomly selected unaltered promoters (c) and enhancers (f) served as a control. The altered or unaltered regions were highlighted in yellow, and H3K27ac tracks were presented using normalized H3K27ac enrichment data.

**a**

|                                       | G1  | G2  | G3   | G4  | G5  | G6   |
|---------------------------------------|-----|-----|------|-----|-----|------|
| Peak number                           | 985 | 837 | 1974 | 871 | 548 | 2715 |
| Annotated gene number                 | 868 | 733 | 1573 | 758 | 514 | 1841 |
| Expressed gene number                 | 574 | 524 | 1146 | 582 | 383 | 1389 |
| Differentially expressed genes (DEGs) | 237 | 247 | 524  | 253 | 177 | 624  |
| DEGs matched to H3K27ac pattern       | 71  | 82  | 413  | 51  | 9   | 442  |

**b**

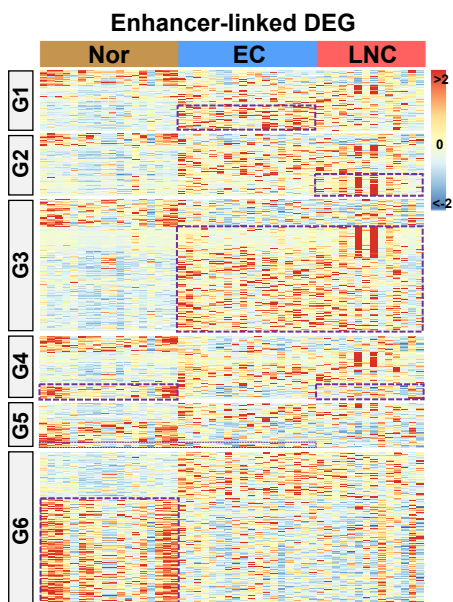

**c**

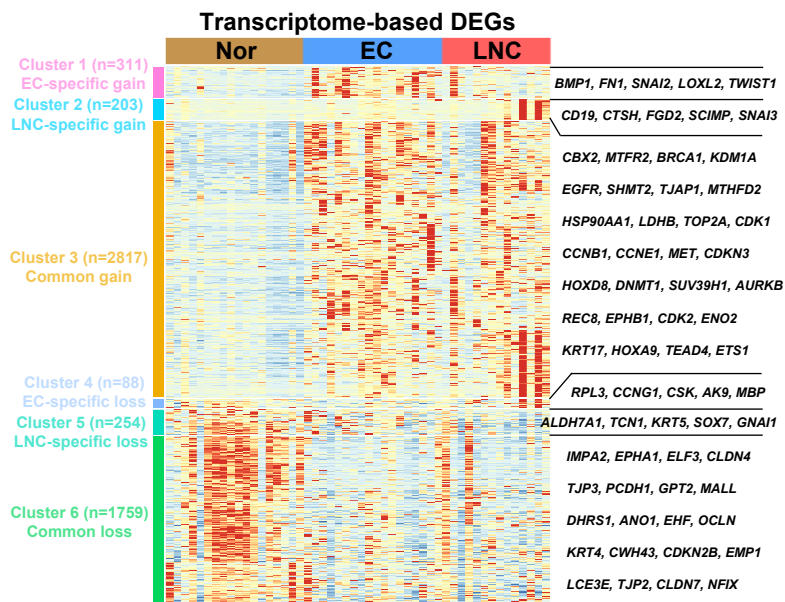

**Supplementary Figure 8. Supplemental data for analysis of enhancers and super-enhancers.**

- a. The expression of differential enhancer (G1-G6; Figure 1b)-associated genes in all samples were determined, and the number of peaks, annotated genes, and expressed genes was presented. The expressed genes (count per million (CPM) > 1 in at least 18 sample) were subjected to DEG analysis between two of three groups, and the number of DEGs was also presented. Among these DEGs, the genes with positively matched H3K27ac enrichment patterns were numbered.
- b. Heatmap showing the expression of expressed genes associated with differential enhancers (G1-G6). The genes matched with H3K27ac enrichment patterns were highlighted with purple boxes.
- c. The expression of DEGs analyzed from 50 transcriptomes. Representative genes were presented at the right panel. Source data are provided as a Source Data file.

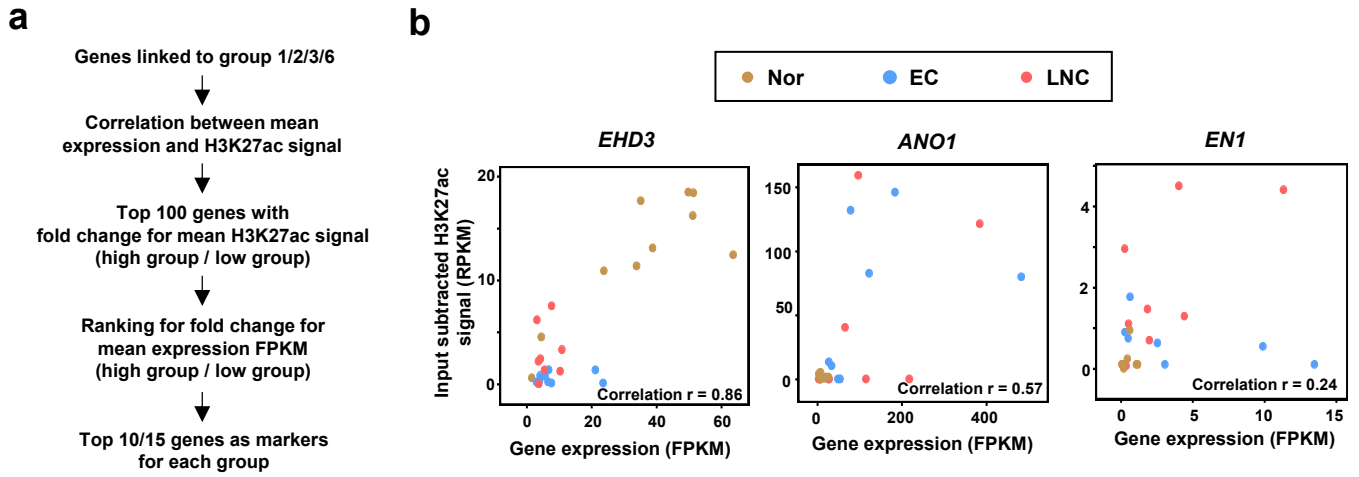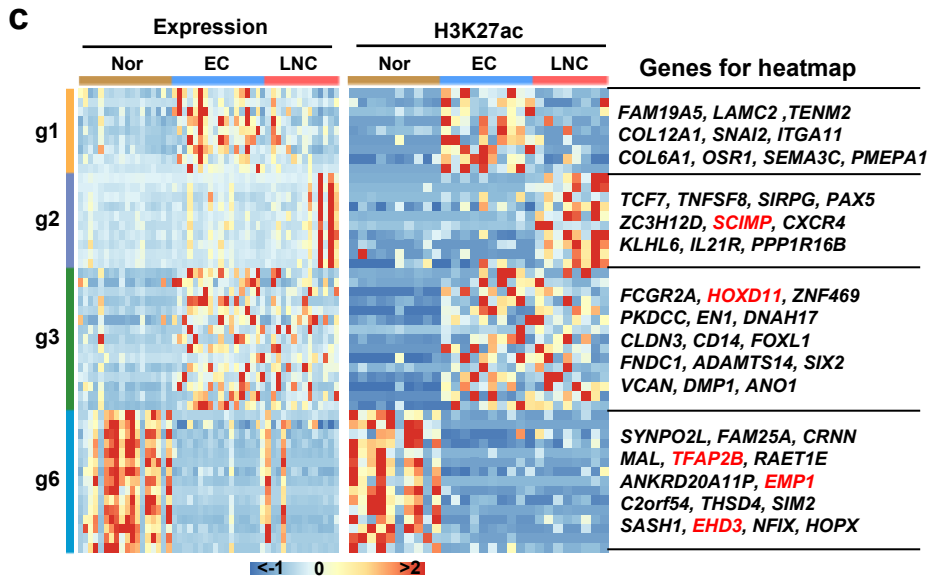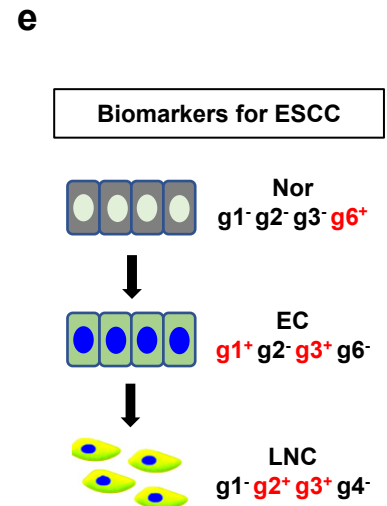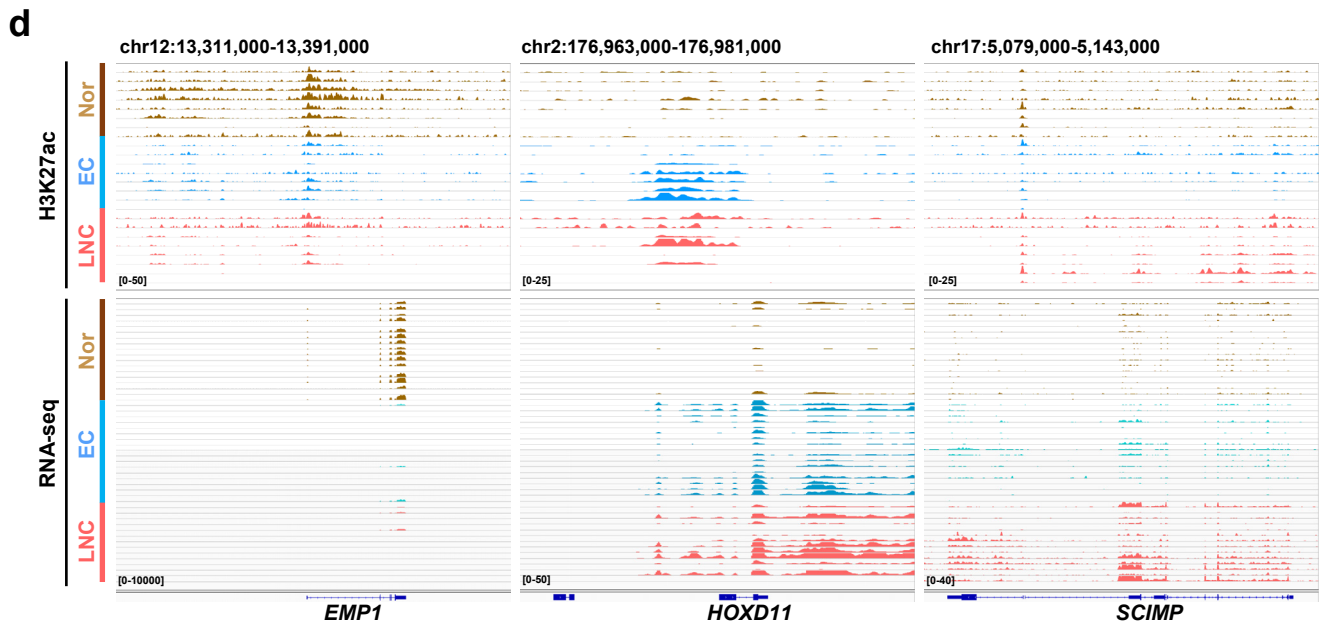

**Supplementary Figure 9. Supplemental data for analysis of enhancers and super-enhancers.**

- a. The pipeline for identifying biomarkers for three groups of samples. Briefly, genes linked to differential enhancers (G1, G2, G3, and G6) were subjected to Pearson correlation analysis with its nearest H3K27ac peak signals in 28 profiles. Genes with positive correlation coefficient were selected out for subsequent analysis. The top 100 genes with most differential H3K27ac enhancers calculated from the ratio of mean H3K27ac peak signals between high group over low group were collected; then these genes were ranked by mRNA expression fold changes of mean expression in TPM (high group / low group). Finally, the top 10/15 genes were designated as biomarkers for G1, G2, G3, and G6 separately.
- b. Examples for the correlation between gene expression (TPM) and nearest H3K27ac enrichment signals (input subtracted; RPKM). Correlation coefficient  $r$  was presented.
- c. Heatmap showing expression of identified biomarkers for g1 (EC-specific high), g2 (LNC-specific high), g3 (common gained), and g6 (common lost). The nearest H3K27ac peak density was shown in the middle panel and the gene names were listed in the right panel.
- d. Representative tracks of H3K27ac ChIP-seq and RNA-seq at the *EMPI*, *HOXD11*, and *SCIMP* loci across Nor, EC, and LNC samples in 10 patients.
- e. Diagram showing biomarker combinations for discriminating Nor, EC, and LNC. Source data are provided as a Source Data file.



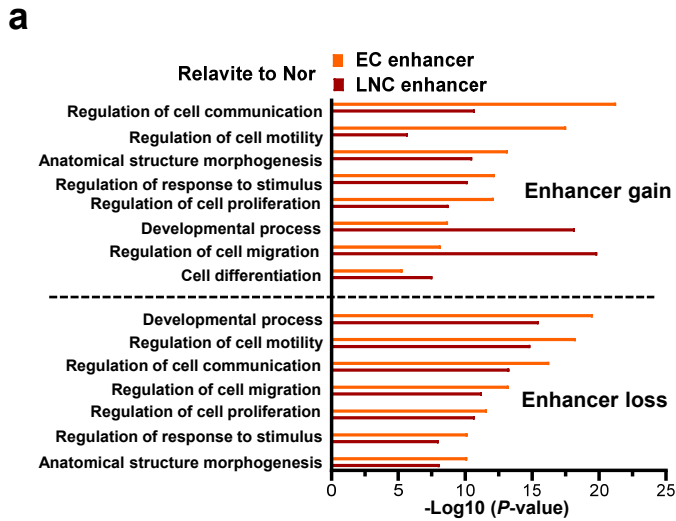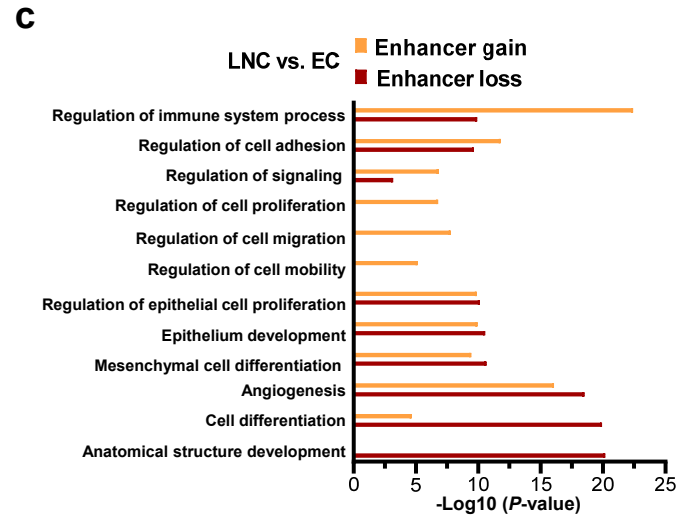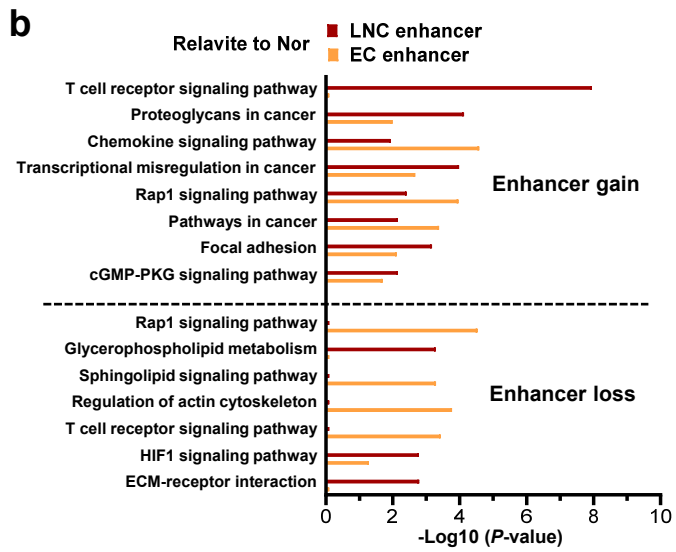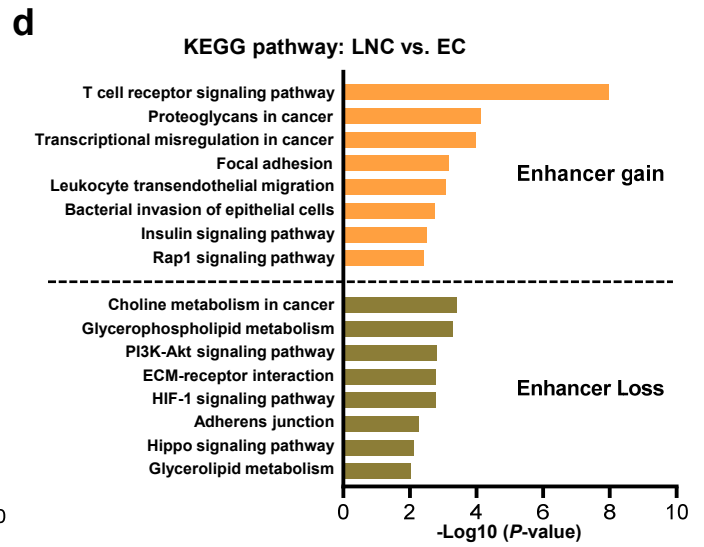

**Supplementary Figure 10. Functional analysis for differential enhancer-associated genes.**

a-b. GO (a) and KEGG pathway (b) analysis of the top 2,000 gained or lost enhancer-linked genes in EC and LNC relative to Nor.

c-d. GO (c) and KEGG pathway (d) analysis of the top 2,000 gained or lost enhancer-linked genes in LNC relative to EC.

**a**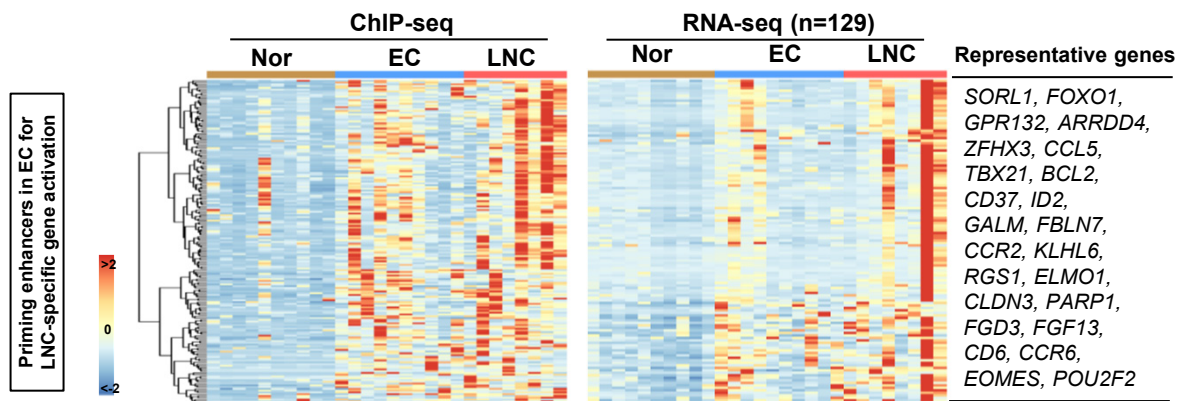**b**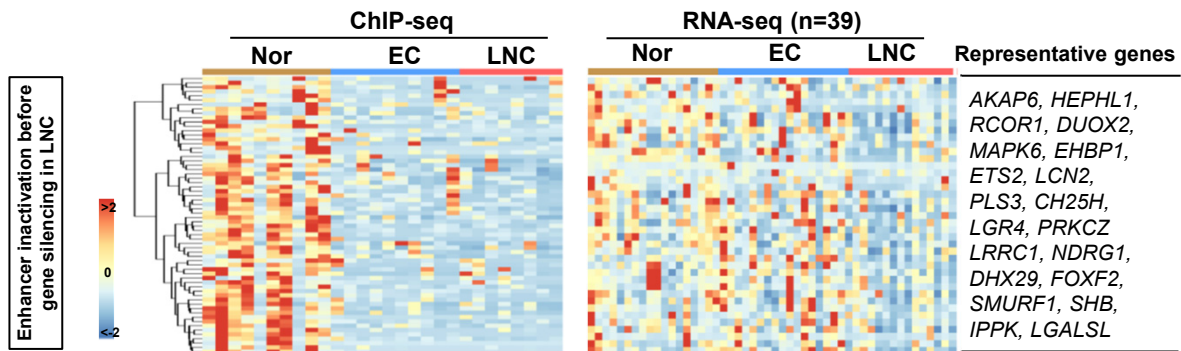

**Supplementary Figure 11. Enhancer gain or loss prior to transcriptional alterations.**

a. Heatmap showing a subgroup of gained H3K27ac-marked enhancers in EC and LNC. The associated gene expression was not significantly gained in EC but was significantly gained in LNC samples.

b. Heatmap showing a subgroup of lost H3K27ac-marked enhancers in EC and LNC. The associated gene expression was not significantly lost in EC but was significantly lost in LNC samples. Source data are provided as a Source Data file.

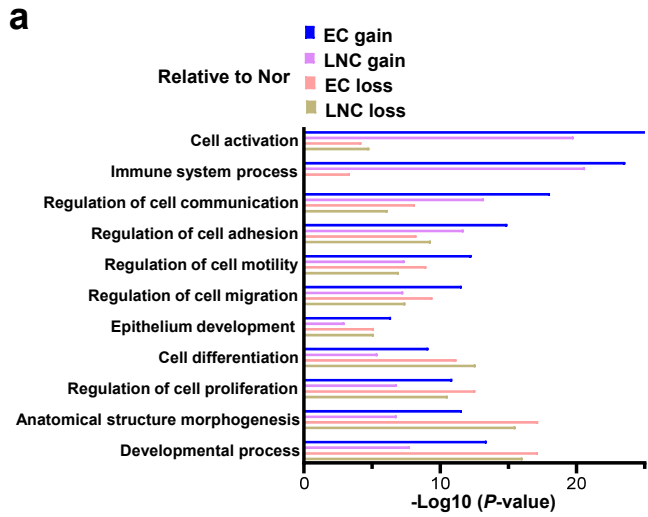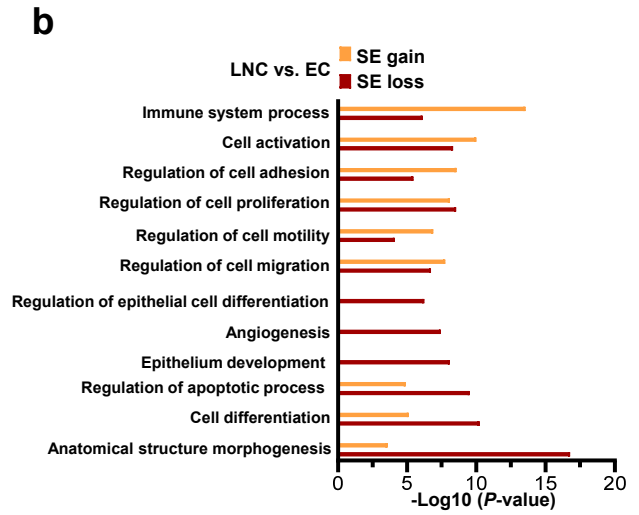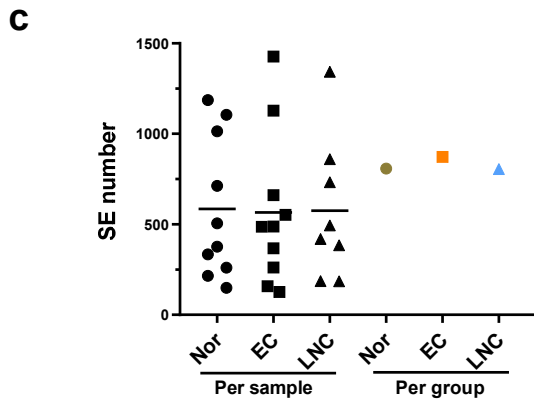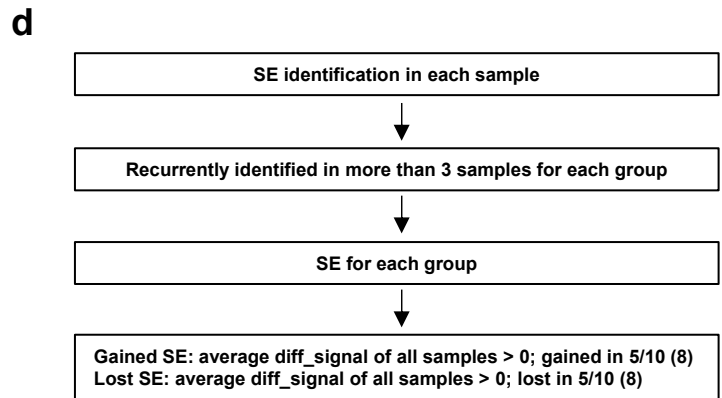

**e** Differential SE identification by each sample

| Regions                 | Definition                      | Total          | Relative to Nor          |                        |                           |                         | Relative to EC            |                         |
|-------------------------|---------------------------------|----------------|--------------------------|------------------------|---------------------------|-------------------------|---------------------------|-------------------------|
|                         |                                 |                | Recurrently gained in EC | Recurrently lost in EC | Recurrently gained in LNC | Recurrently lost in LNC | Recurrently gained in LNC | Recurrently lost in LNC |
| SEs                     | H3K27ac <sup>+</sup> /promoter- | 1,223          | 615                      | 505                    | 491                       | 429                     | 373                       | 415                     |
| Overlap with (Fig. S6g) | H3K27ac <sup>+</sup> /promoter- | 948<br>(1,042) | 387 (436)                | 355 (481)              | 427 (341)                 | 310 (255)               | 271 (437)                 | 179 (217)               |
| Combination             | H3K27ac <sup>+</sup> /promoter- | 1,317          | 657                      | 536                    | 531                       | 472                     | 406                       | 449                     |

Note: Fig. S6g-differential SE identification by mean signal for each group.

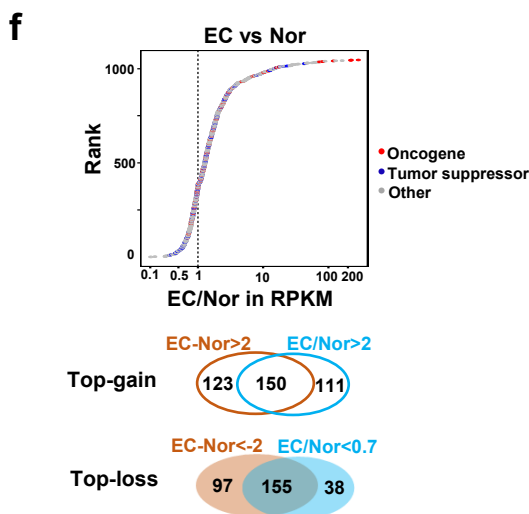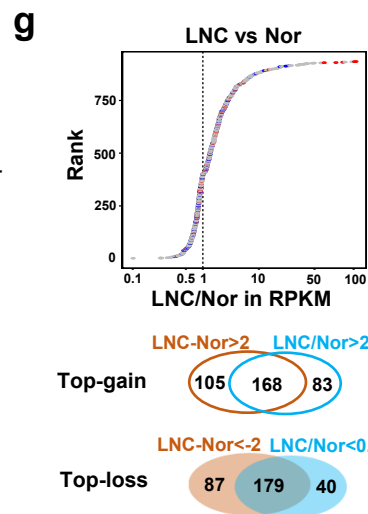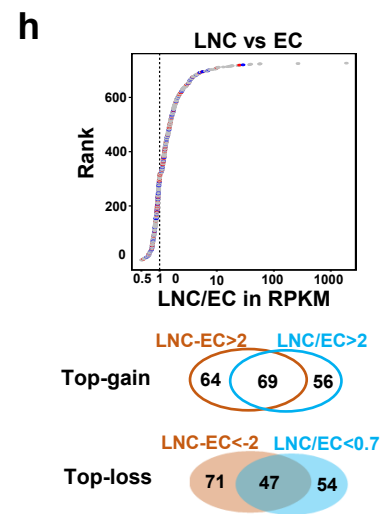

### **Supplementary Figure 12. Supporting data for super-enhancer analysis.**

- a. GO analysis of altered (gained or lost) super-enhancer-associated genes in EC and LNC relative to Nor.
- b. GO analysis of altered (gained or lost) super-enhancer-associated genes in LNC relative to EC.
- c. Comparison of the number of super-enhancers calculated from each H3K27ac profile or average H3K27ac signals per group. Lines indicate the mean values of the number of super-enhancers.
- d. The pipeline for identifying altered super-enhancers based on SEs identified from each sample. Super-enhancers that were recurrently identified in  $\geq 3$  samples for each group were defined as super-enhancers for each group. The criteria for identifying altered enhancers were identical to that in Supplementary Figure 6g.
- e. Number of the total, recurrently gained, lost super-enhancers in EC or LNC relative to Nor, as well as number of recurrently gained and lost super-enhancers in LNC relative to EC. Super-enhancers (SEs) were identified from combinations from each sample. The overlapped and combined number of presented super-enhancers were displayed. The number of super-enhancers shown in Supplementary Figure 6g was presented in red.
- f-h. Identification of differential super-enhancers by fold change of super-enhancer-covered H3K27ac signals. All super-enhancers were ranked according to the fold change between two compared groups. In the lower panel, we combined fold change and absolute difference of super-enhancer-covered H3K27ac signals to identify top gained or lost super-enhancers (EC vs. Nor, LNC vs. Nor, and LNC vs. EC). For identifying top gained super-enhancers, the super-enhancers with absolute difference  $> 2$  and fold change  $> 2$  were overlapped; for identifying top lost super-enhancers, the super-enhancers with absolute difference  $< -2$  and fold change  $< 0.7$  (to retain a comparable number of lost super-enhancers when considering fold change) were overlapped. Source data are provided as a Source Data file.

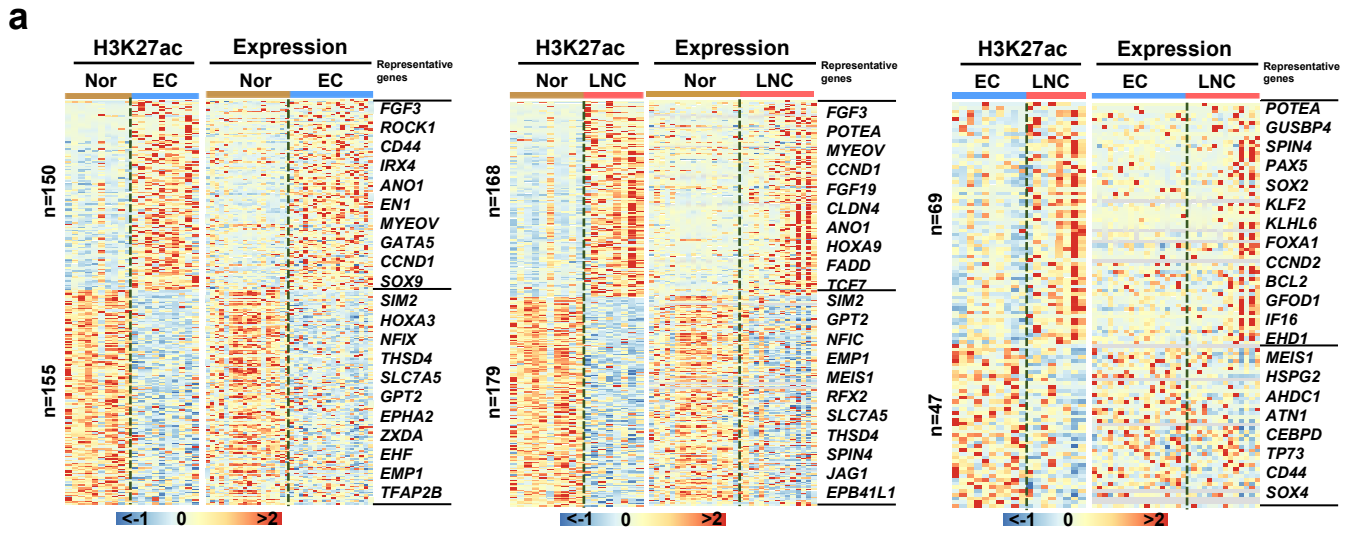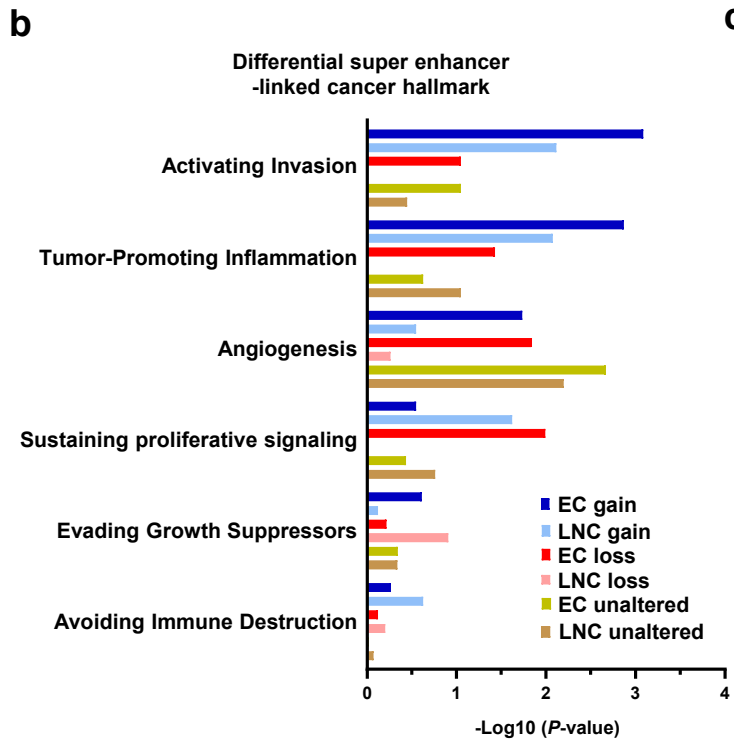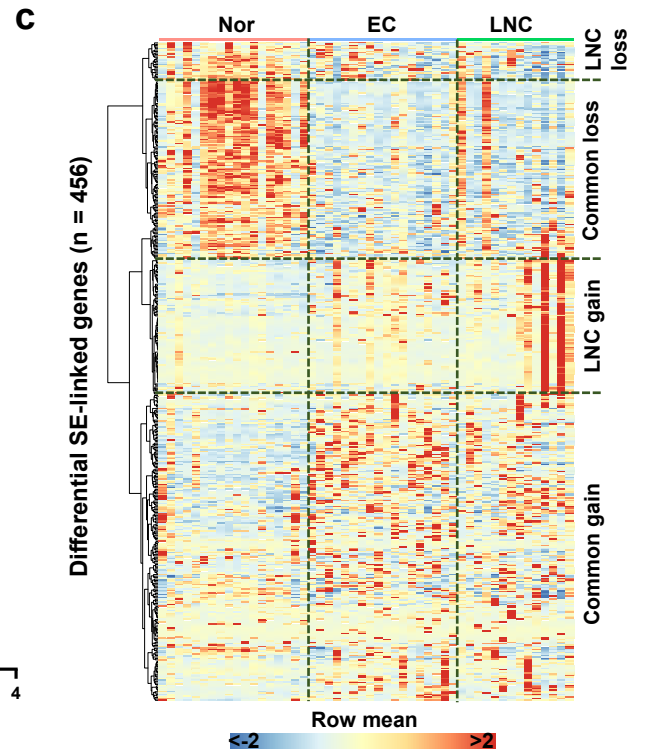

**Supplementary Figure 13. Supporting data for super-enhancer analysis.**

a. Heatmap showing the H3K27ac signals within differential super-enhancers and expression of differential super-enhancer-associated genes. The differential super-enhancers were obtained from overlapped terms in Supplementary Figure 12f-g. Representative genes for each group were listed in the right panel.

b. Cancer hallmark analysis using differential SEs (EC gain, EC loss, LNC gain, and LNC loss relative to Nor)-associated genes. Nearby genes associated with unaltered super-enhancers in EC and LNC relative to Nor served as a control.

c. Heatmap showing the expression of 456 differential super-enhancer-associated genes across Nor, EC, and LNC samples. These genes were a combination of differential super-enhancer-associated genes in a. These genes were classified into 4 sub-groups: LNC-specific loss, common loss, LNC-specific gain, and common gain. Source data are provided as a Source Data file.



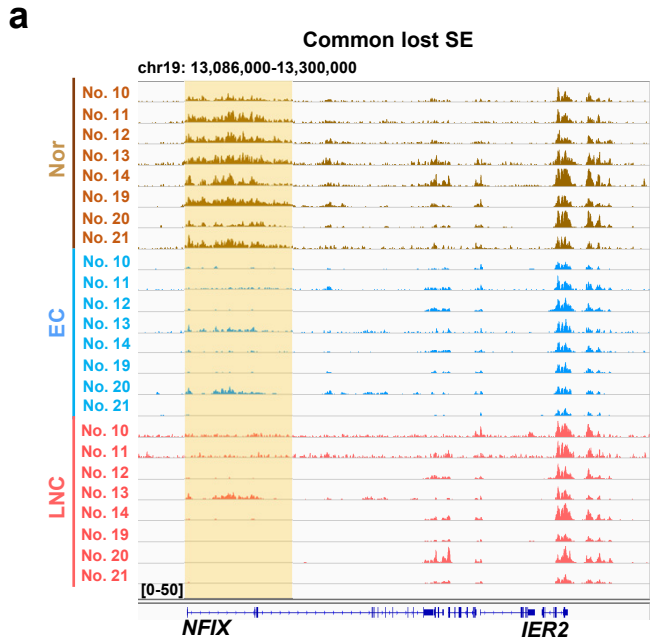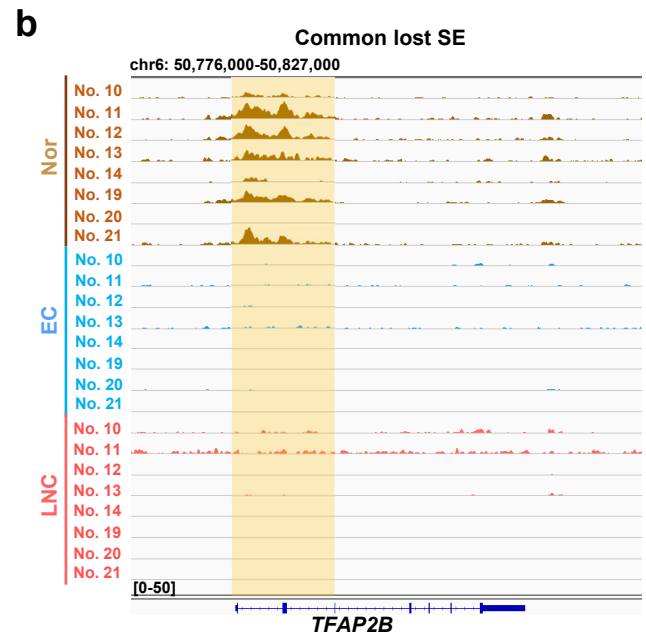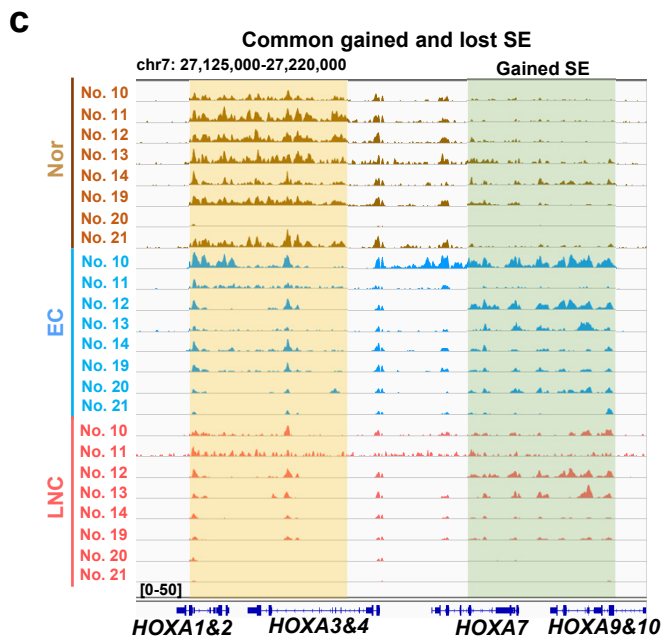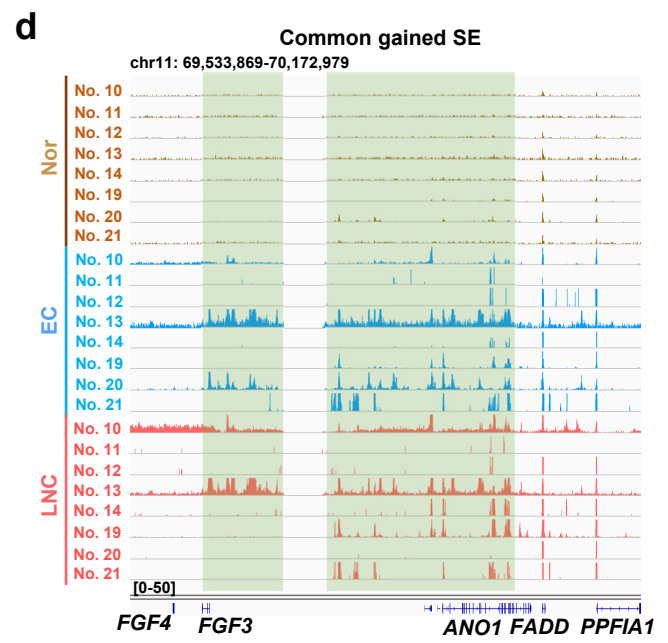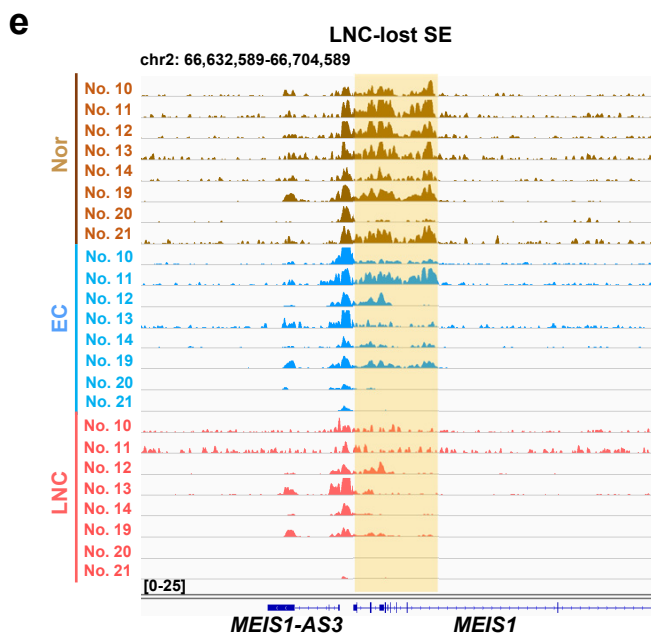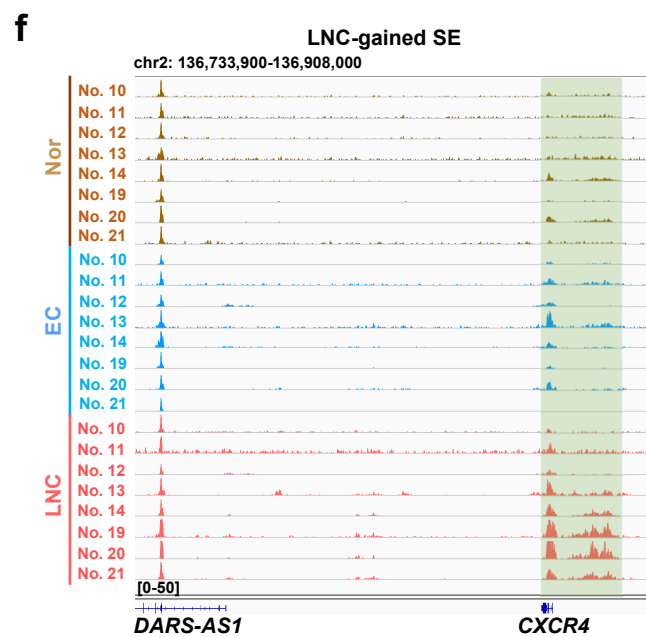

**Supplementary Figure 14. Examples for gained and lost super-enhancers.**

a-f. H3K27ac tracks showing commonly lost (highlighted in yellow) and gained (highlighted in green) super-enhancers (SEs) relative to Nor. It was worth noticing that there were two neighboring altered super-enhancers, including a lost SE covering *HOXA1/2/3/4* as well as a gained SE covering *HOXA7/9/10*.

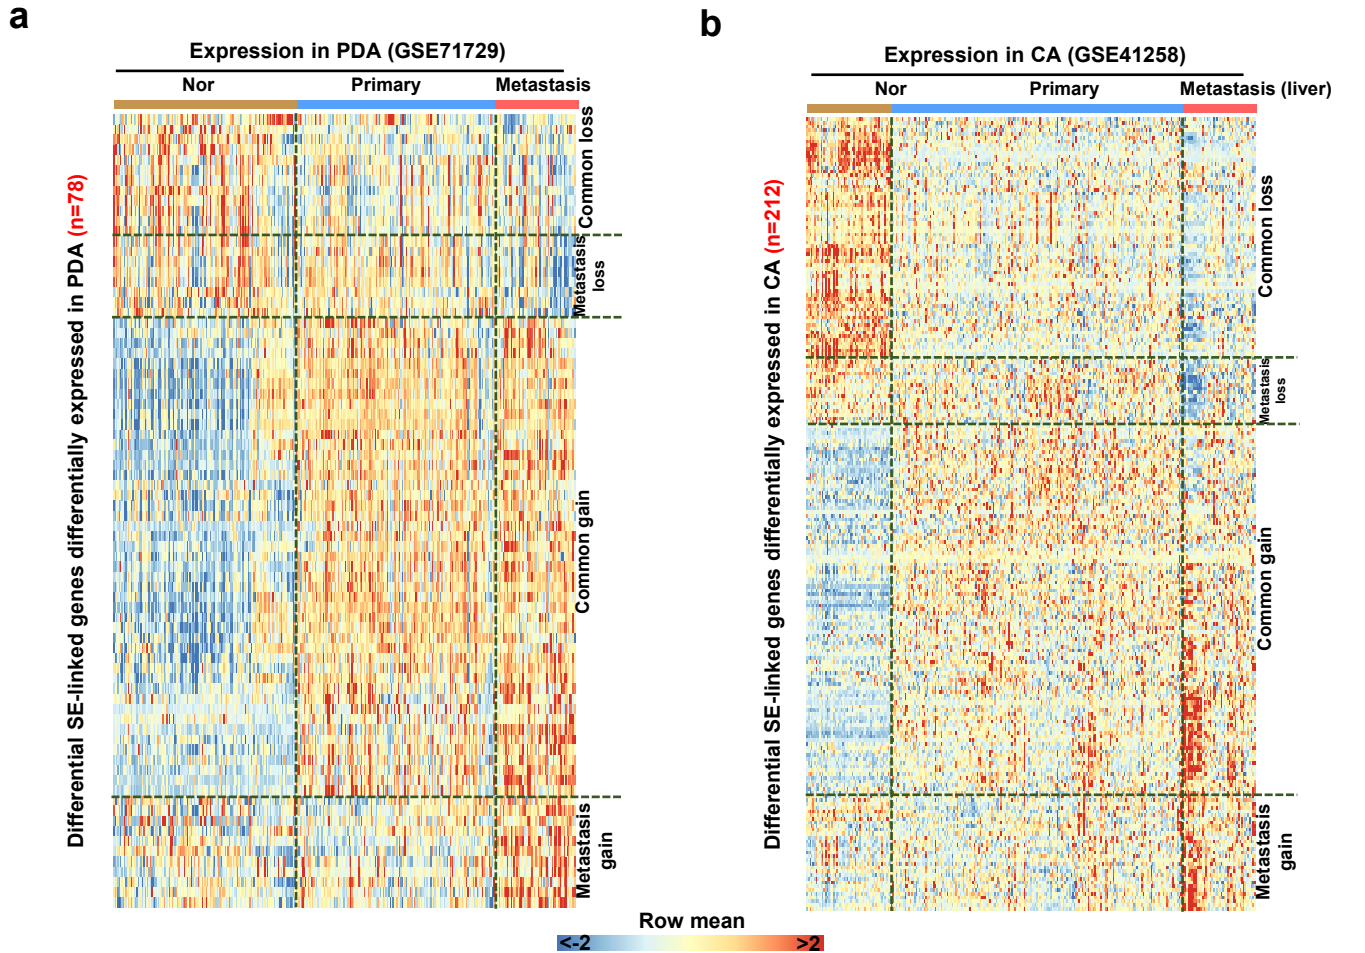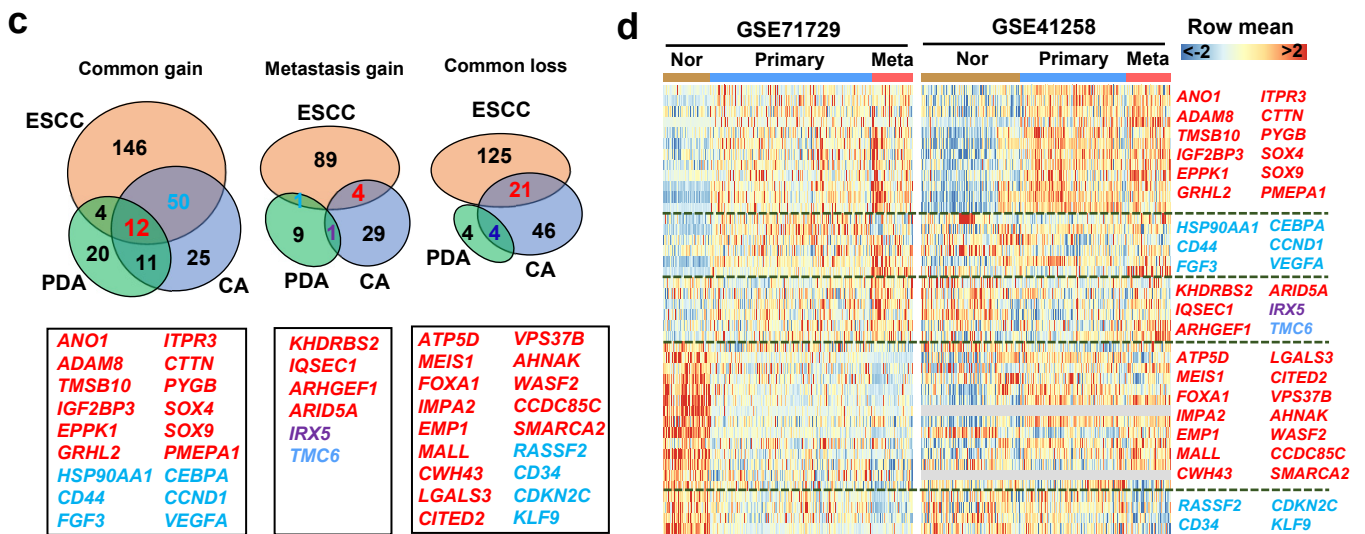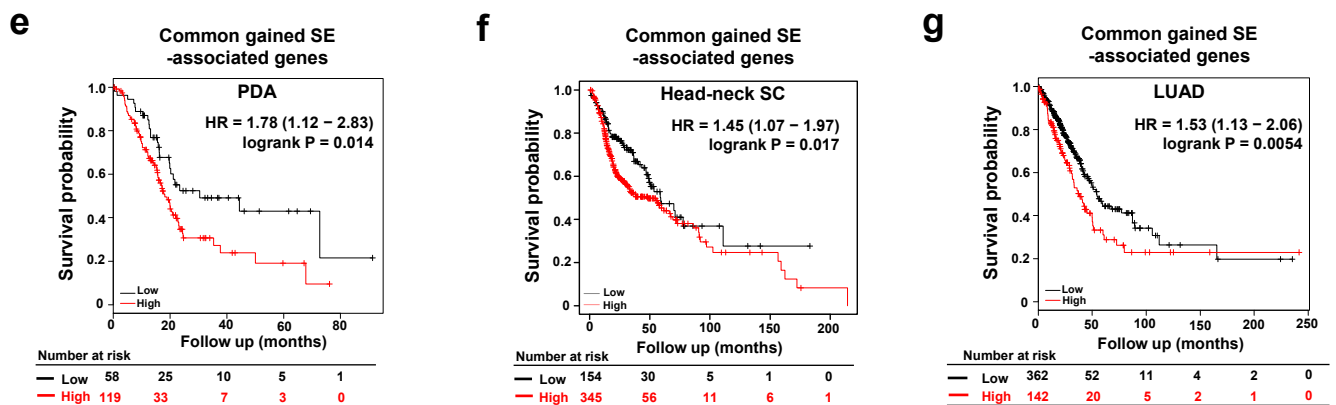

**Supplementary Figure 15. Differential super-enhancer-linked gene expression in other cancers.**

a-b. DEG analysis of differential super-enhancers-linked genes in PDA (GSE71729) and CA (GSE41258). These genes were categorized into four indicated subgroups.

c. Common gained, metastasis gained, and common lost genes from ESCC, PDA, and CA were overlapped and presented in Venn diagram. Representative genes for overlapped genes were shown below, and the color of gene names was matched to the overlapped groups.

d. Heatmap showing the expression of representative genes in c.

e-g. Survival analysis comparing patient groups with high or low expression of top gained SEs-associated genes in ESCC using Kaplan-Meier plotter with PDA (e), Head-neck squamous cancer (SC) (f), and LUAD (g) patients from TCGA database. LogRank test was performed for the survival data. The number of patients was listed below. Source data are provided as a Source Data file.

**a**

|                      | DNA motif   | TF     | P-value | % targets |
|----------------------|-------------|--------|---------|-----------|
| Common lost enhancer | TGGCTACCTAA | OSR1   | 1e-16   | 0.33      |
|                      | AGCTTCACA   | TBX21  | 1e-15   | 35.1      |
|                      | TATAATAAAAG | ARID3A | 1e-13   | 0.48      |
|                      | GTTTGCACA   | NFIA   | 1e-13   | 11.93     |
|                      | AAGCAGGGC   | ZNF416 | 1e-13   | 11.12     |
|                      | GAGCCACTC   | NKX2.5 | 1e-12   | 12.93     |
|                      | ATAGCCTGAT  | TCF4   | 1e-12   | 0.29      |
|                      | CTGACATTAG  | MEIS1  | 1e-9    | 4.16      |
|                      | GTAGAAAGGAA | ELF3   | 1e-7    | 0.44      |

**b**

|                            | DNA motif    | TF     | P-value | % targets |
|----------------------------|--------------|--------|---------|-----------|
| LNC-specific lost enhancer | GGAGAGTCAGCC | MAFA   | 1e-10   | 2.55      |
|                            | GCCTATGGTGA  | SOX14  | 1e-9    | 1.28      |
|                            | AAATCTGCCCA  | BCL11A | 1e-9    | 1.28      |
|                            | CTGTCCAGTTC  | ZNF416 | 1e-9    | 3.28      |
|                            | TGTTGTAAAT   | LIN45  | 1e-8    | 3.1       |
|                            | GTTGCTCCG    | NFIX   | 1e-8    | 2.19      |
|                            | CACGCTCCG    | RFXDC2 | 1e-7    | 2.01      |
|                            | GTTTTGTGATTT | FOXA2  | 1e-7    | 0.73      |

**c**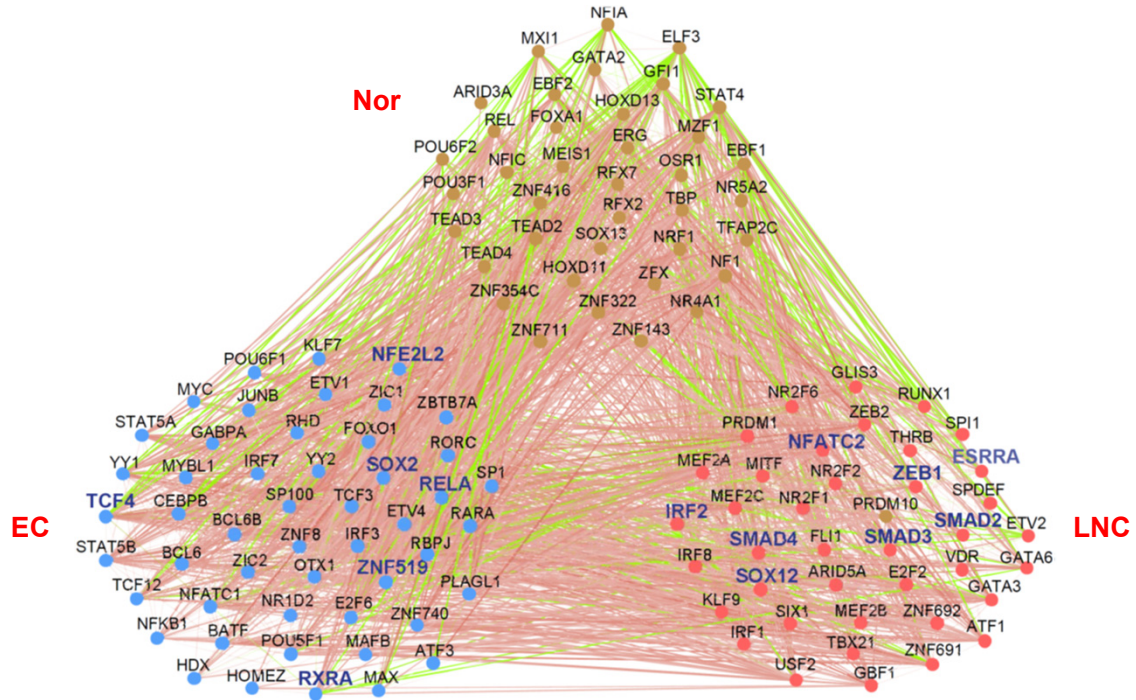

**Supplementary Figure 16. Altered enhancer predicted TF binding activities and network.**

a-b. Top transcription factor (TF) binding motifs predicted from common lost (a) or LNC-specific lost (b) enhancers using HOMER. The predicted TFs were ranked by *P* value.

c. TF interaction network across three groups of samples using top predicted TFs. Correlation between two TFs was calculated according to the RNA-seq expression in three cohorts, and the correlation within the same group was not presented. A positive correlation between two TFs was linked with red lines, and negative correlation between two TFs was linked with green lines.





**Supplementary Figure 17. Supporting data for functional analysis of gained enhancer-predicted TFs.**

a. Representative images showing the GFP fluorescence as indications for shRNAs expression. Lentiviral infected TE1 cells were enriched to obtain 100% GFP positive cells. GFP fluorescence was used for cell counting. Three independent experiments with three repeats were performed, and similar results were obtained.

b. Representative images showing the wound healing status at day 0 and day 2 using GFP fluorescence. The formula for calculating the wound healing rate was provided. Three independent experiments with three repeats were performed, and similar results were obtained.

c. Quantitative real-time PCR analysis of *p21*, *c-Myc*, *SNAIL*, and *FNI* expression upon knockdown of 12 gained enhancer-predicted TFs. n=2 biologically independent experiments examined. Source data are provided as a Source Data file.



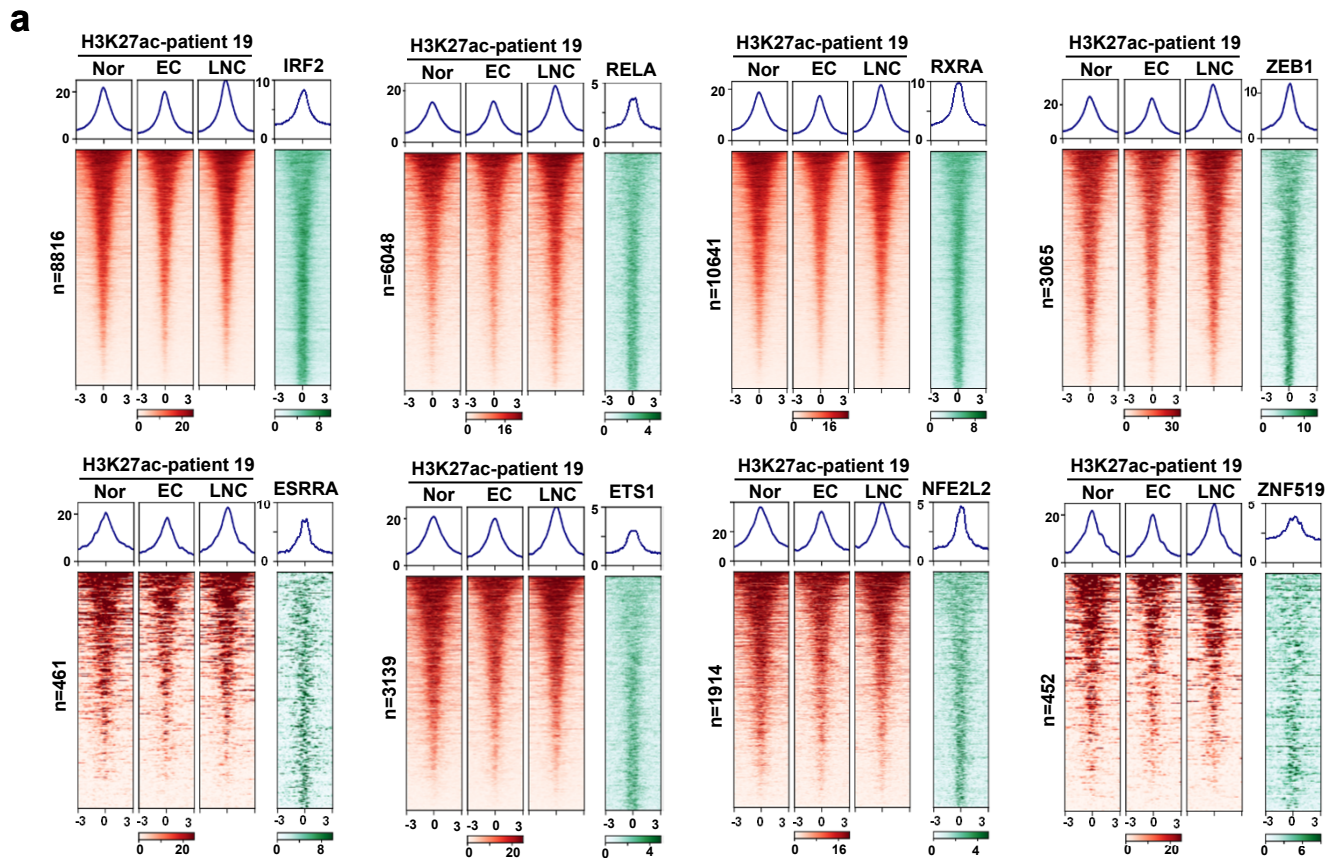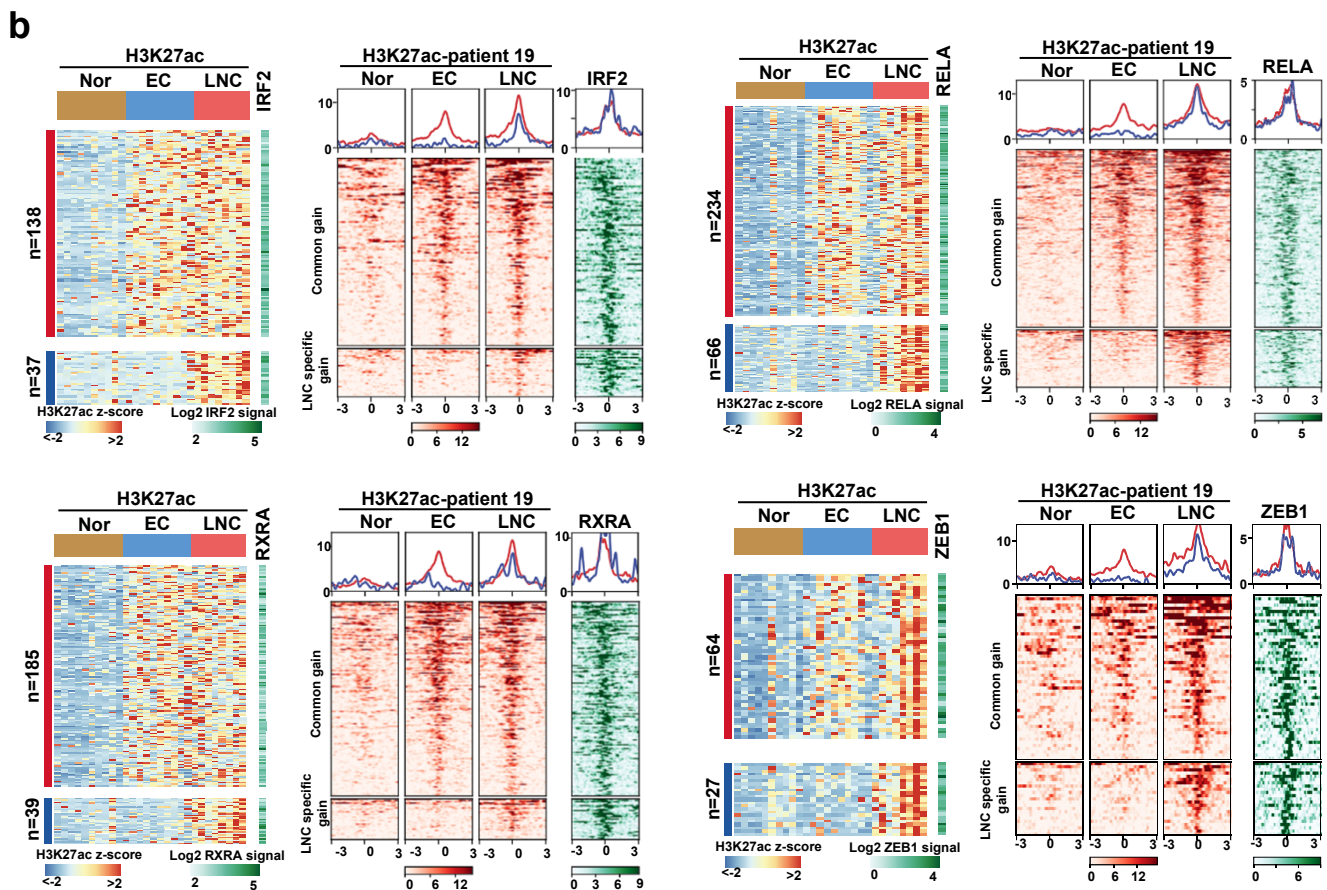

**Supplementary Figure 18. Co-occupancy between key TF binding peaks and H3K27ac peaks.**

a. All H3K27ac enhancers were overlapped with 8 TF binding profiles (dataset available in ENCODE database), and co-occupied regions were presented in a representative patient (patient 19) or in cell lines (Information was provided in Supplementary Data 20).

b. Common gained and LNC-specific gained H3K27ac enhancers were overlapped with 8 TF binding profiles respectively, and co-occupied regions were represented, and associated genes were listed in Supplementary Data 20. Source data are provided as a Source Data file.

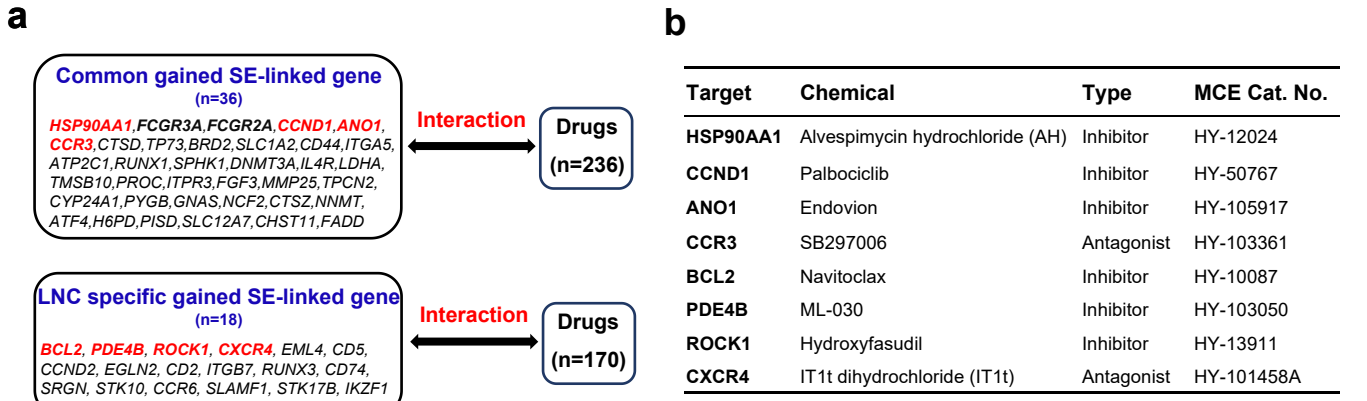

**b**

| Target   | Chemical                        | Type       | MCE Cat. No. |
|----------|---------------------------------|------------|--------------|
| HSP90AA1 | Alvespimycin hydrochloride (AH) | Inhibitor  | HY-12024     |
| CCND1    | Palbociclib                     | Inhibitor  | HY-50767     |
| ANO1     | Endovion                        | Inhibitor  | HY-105917    |
| CCR3     | SB297006                        | Antagonist | HY-103361    |
| BCL2     | Navitoclax                      | Inhibitor  | HY-10087     |
| PDE4B    | ML-030                          | Inhibitor  | HY-103050    |
| ROCK1    | Hydroxyfasudil                  | Inhibitor  | HY-13911     |
| CXCR4    | IT1t dihydrochloride (IT1t)     | Antagonist | HY-101458A   |

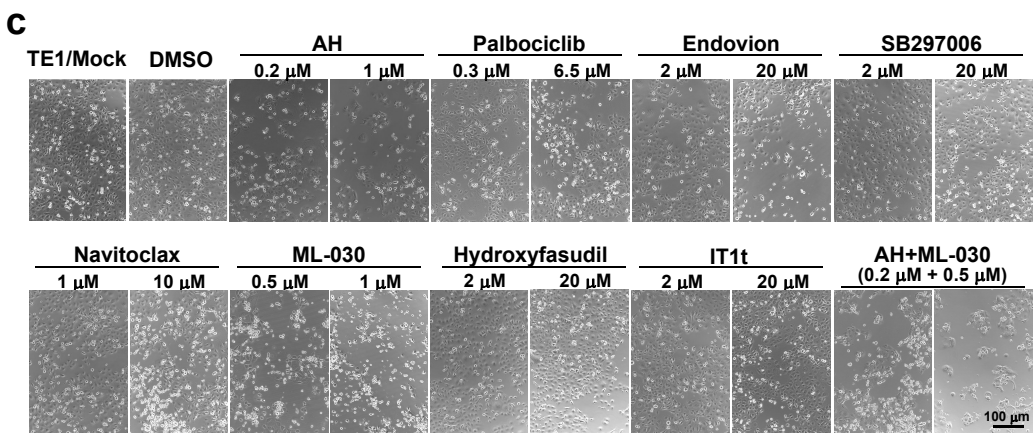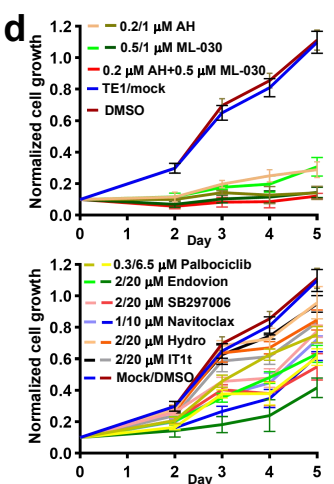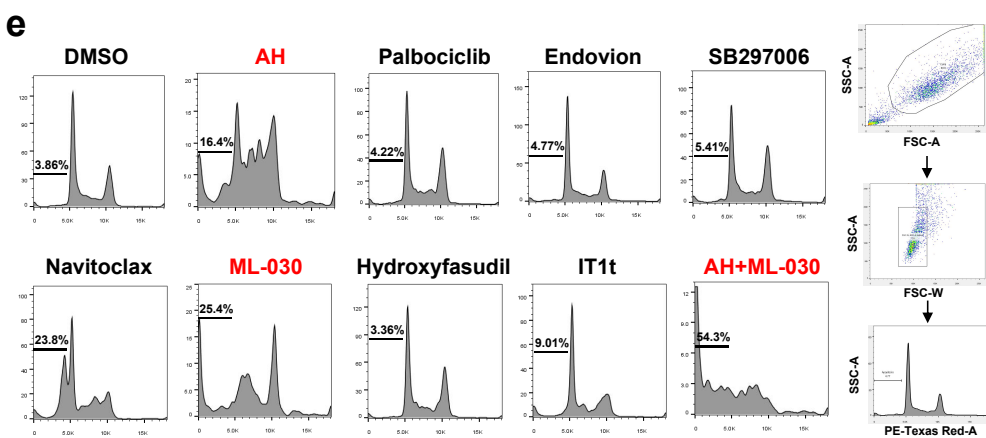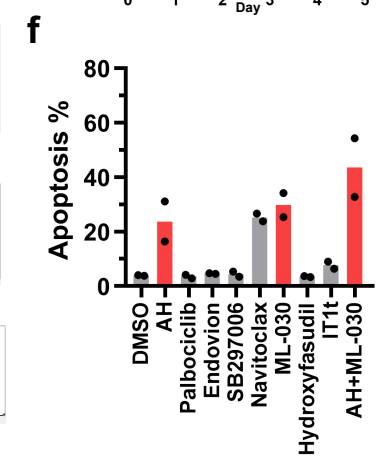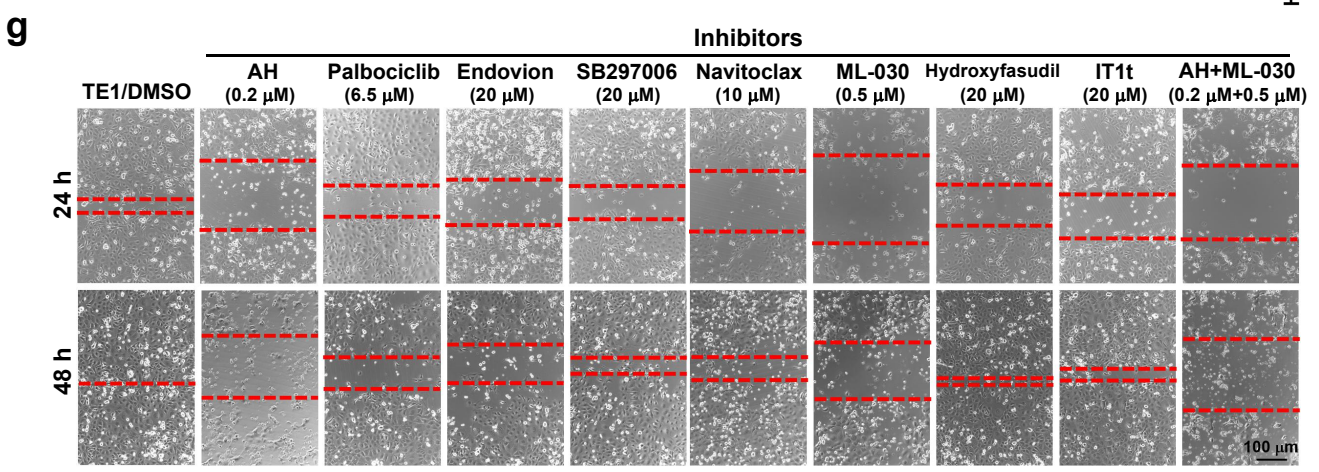

**Supplementary Figure 19. Supporting data for functional analysis of super-enhancer predicted drugs.**

a. Common gained and LNC specific gained super-enhancer (SE)-linked genes were subjected to the Drug Gene Interaction Database (DGIdb). 36 common gained SE-linked genes were potentially interacting with 236 drugs, and 18 LNC-specific gained SE-linked genes were potentially interacting with 170 drugs.

b. Top 8 targets predicted from gained super-enhancer (SE)-linked gene-drug interactions, their chemical inhibitors, and catalog numbers from MCE (MCE Cat. No.) were listed.

c. Representative images showing TE1 cells responding to indicated concentrations of chemical inhibitors. AH+ML-030: combined use of the two chemicals. The DMSO and mock group served as controls. Two independent experiments with three repeats were performed, and similar results were obtained.

d. TE1 cells treated with chemical inhibitors were counted at day 0, 1, 2, 3, 4, and 5. Mock TE1 cells and DMSO group served as controls. Data are presented as mean values  $\pm$  s.d.. n=3 biologically independent experiments examined.

e. Apoptotic analysis of TE1 cells responding to indicated chemical inhibitors with higher concentrations used in c. Representative results for apoptotic analysis were presented with the percentages of apoptotic cells, and an example for gating strategy was also presented for Endovion-treated group.

f. Statistical analyses of cell apoptosis in e. n=2 biologically independent experiments examined. Source data are provided as a Source Data file.

g. Representative images showing TE1 cell migration in responding to indicated concentrations of chemical inhibitors after scraping for 24 and 48 h. Dashed red lines indicates the edge of wounds. Three independent experiments with three repeats were performed, and similar results were obtained. Source data are provided as a Source Data file.



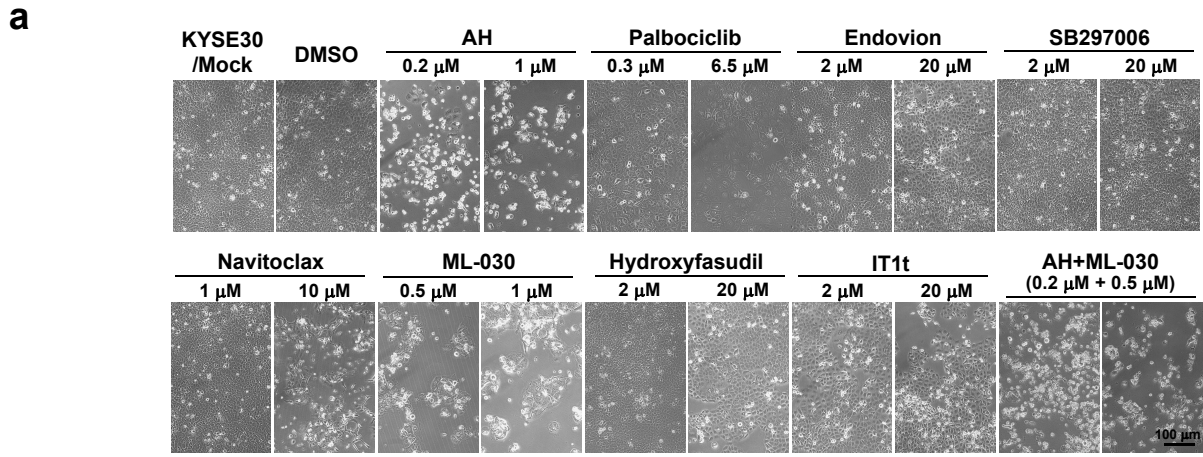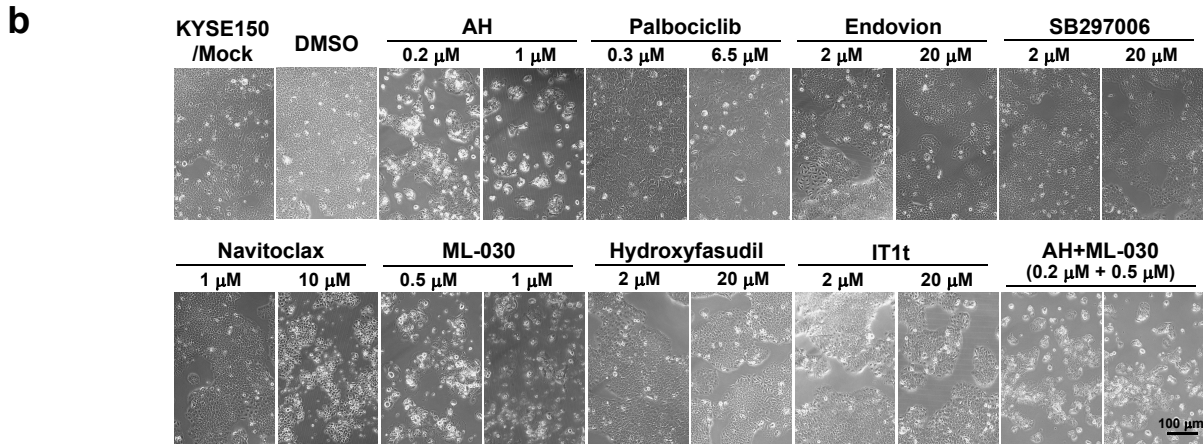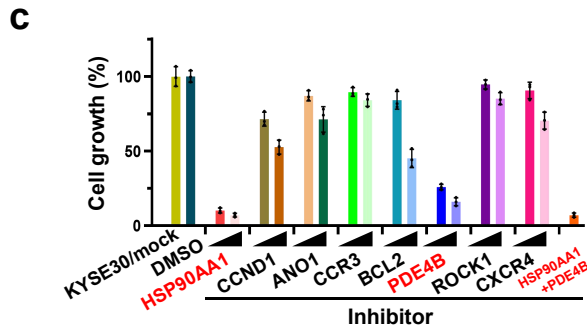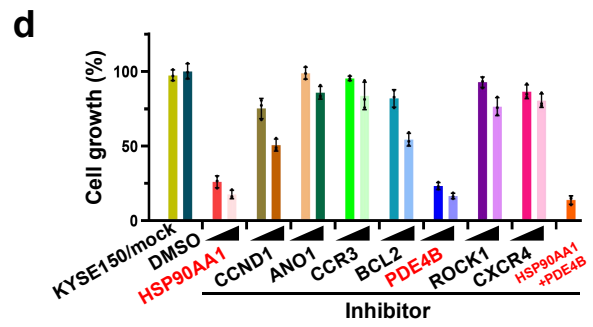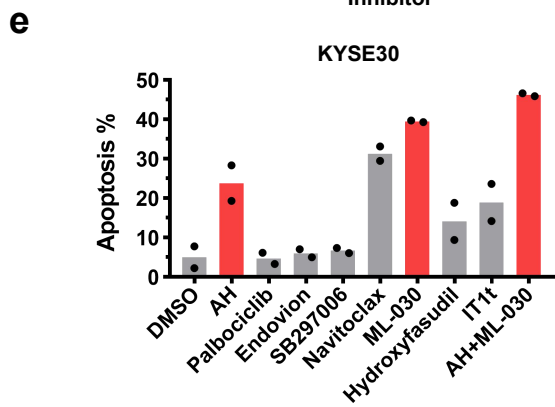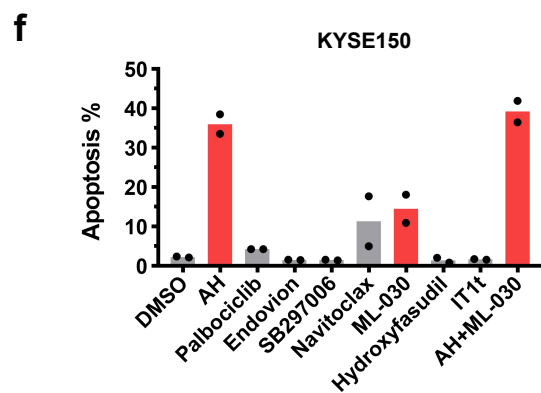

**Supplementary Figure 20. Additional data for functional analysis of super-enhancer predicted drugs.**

a-b. Representative images showing KYSE30 (a) and KYSE150 (b) cells responding to indicated concentrations of chemical inhibitors. AH+ML-030: combined use of the two chemicals. The DMSO and mock group served as controls. Two independent experiments with three repeats were performed, and similar results were obtained.

c-d. KYSE30 (c) and KYSE150 (d) cells were treated with DMSO, with each of 8 chemical inhibitors (higher concentration used in a) separately, or with a combination of HSP90AA1 and PDE4B inhibitors (AH+ML-030). Cell number was counted at 72 h using cell counter. Data are presented as mean values  $\pm$  s.d.. n=3 biologically independent experiments presented.

e-f. Apoptotic analysis of KYSE30 (e) and KYSE150 (f) cells responding to indicated chemical inhibitors with higher concentrations used in a. Representative results for apoptotic analysis were presented with the percentages of apoptotic cells. n=2 biologically independent experiments presented. Source data are provided as a Source Data file.

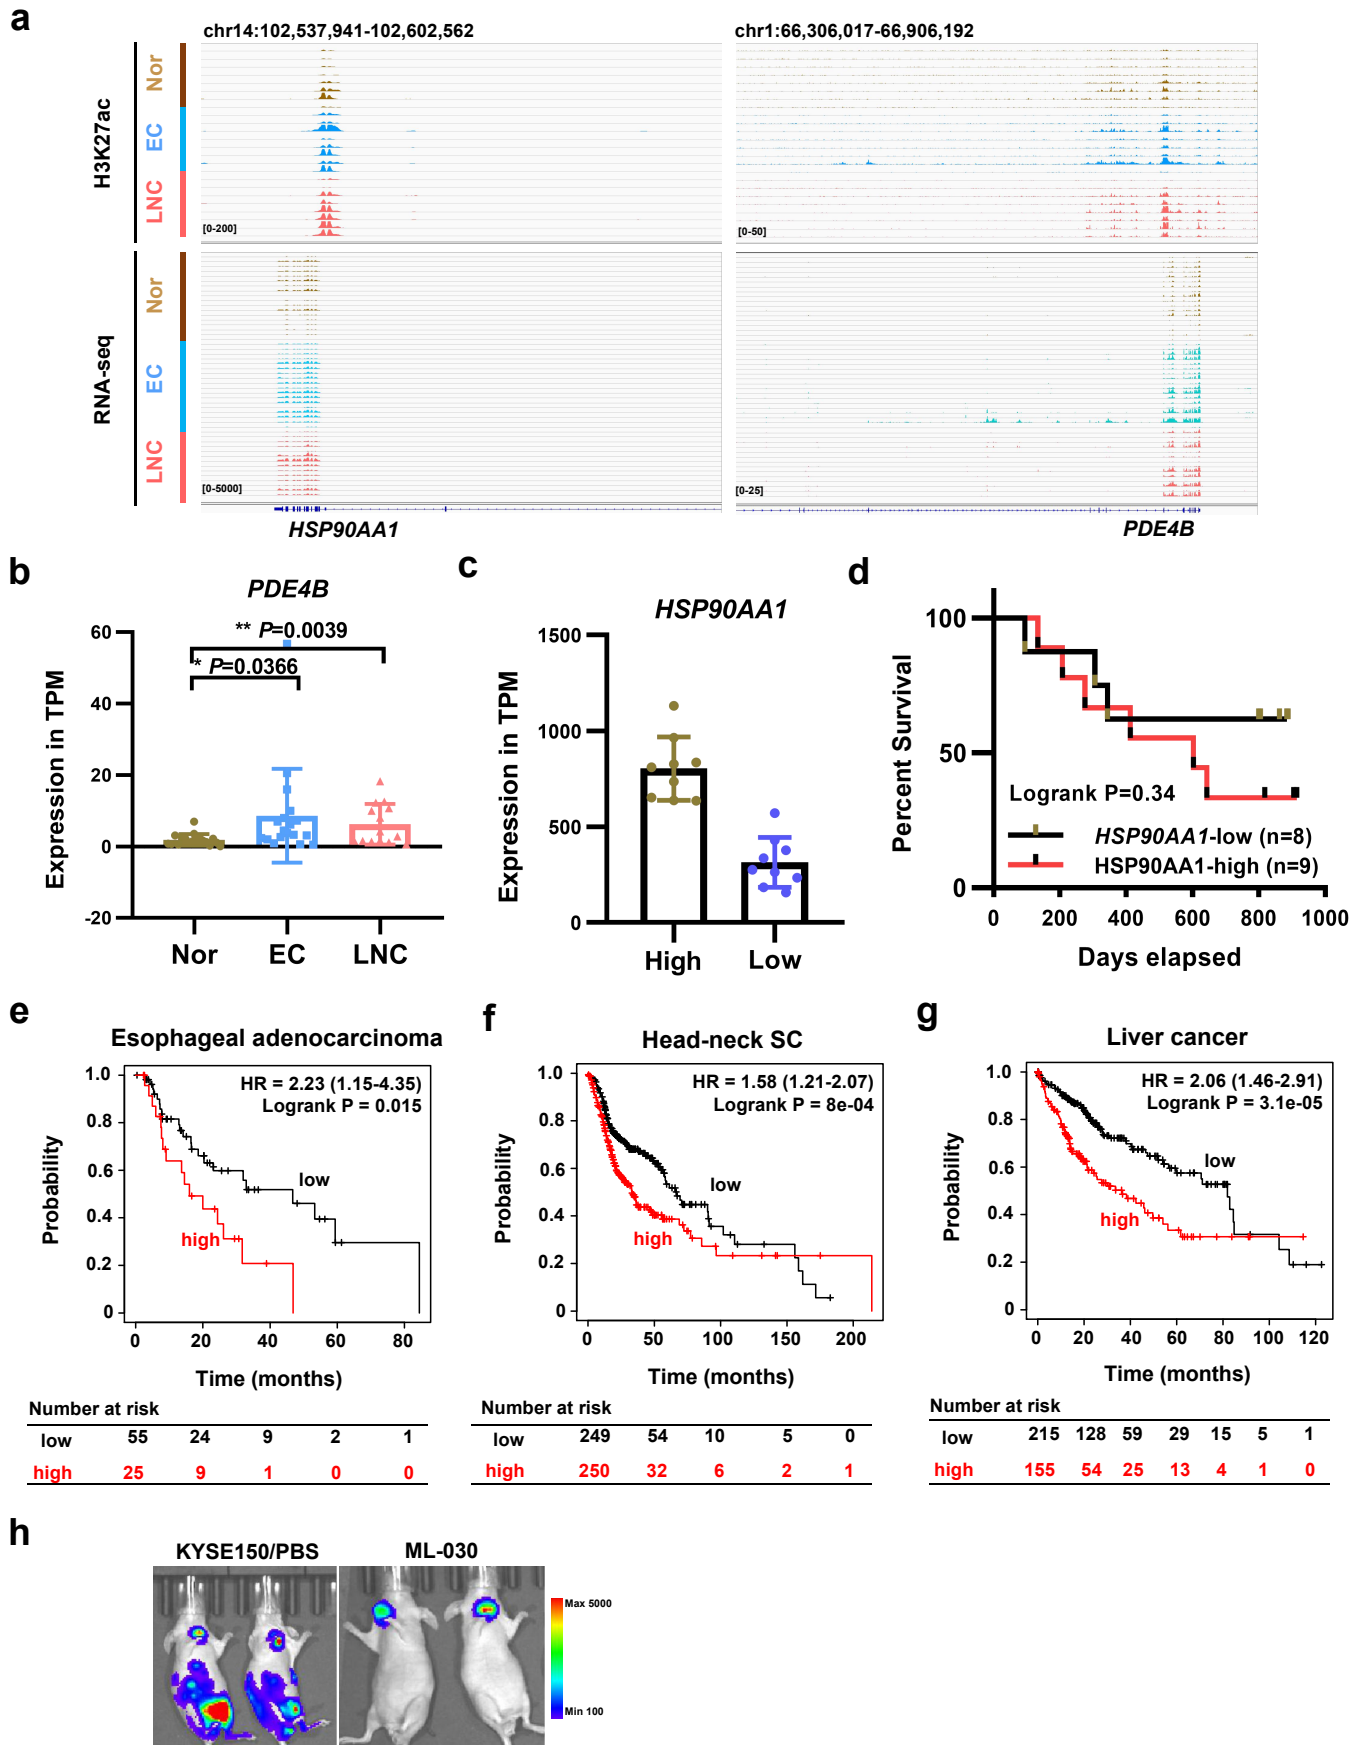

**Supplementary Figure 21. Validation of HSP90AA1 and PDE4B functions.**

a. H3K27ac and RNA-seq tracks showing gained super-enhancers and upregulated gene expression for *HSP90AA1* and *PDE4B*.

b. *PDE4B* expression in TPM in Nor, EC, and LNC samples. n=18 for Nor and EC; n=14 for LNC. Data are presented as mean values  $\pm$  s.d. \* $P < 0.05$ , \*\* $P < 0.01$ , unpaired *t*-test (two-tailed). Source data are provided as a Source Data file.

c. Patients were divided into two sub-groups with high (n=9) or low (n=9) *HSP90AA1* expression in EC. The expression of *HSP90AA1* in two sub-groups was presented. Data are presented as mean values  $\pm$  s.d.

d. Survival analysis of the patients with high (n=9) or low (n=8) *HSP90AA1* expression in EC (the survival information for one patient was not available). LogRank *P*-value was calculated using LogRank test.

e-g. Survival analysis comparing patient groups with high or low expression of *HSP90AA1* using Kaplan-Meier plotter with esophageal adenocarcinoma (e), Head-neck SC (f), and liver cancer (g) patients from TCGA database. The number of patients was listed below. LogRank test was performed for the survival data.

h. Bioluminescent imaging at 4 weeks post intramuscular injection (around the neck region to mimic esophagus cancer) of  $1 \times 10^5$  KYSE150 cells stably expressing firefly luciferase cDNA that was introduced by lentiviruses. ML-030 (20 mg/kg) was administrated through intraperitoneal injection every three days, starting from the day after cell implantation. PBS group served as a control. Four mice were used for each group and two mice were presented in a representative image for image capture. Source data are provided as a Source Data file.



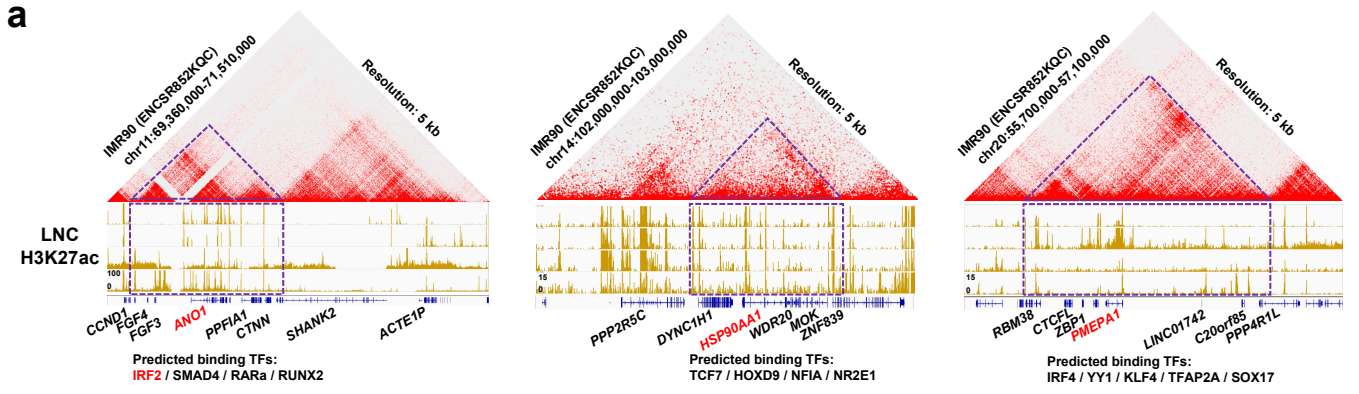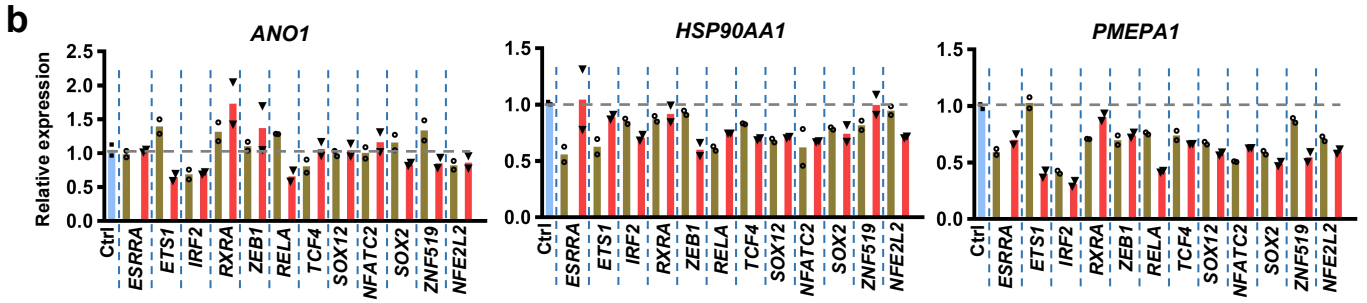

**Supplementary Figure 22. Distal regulation of gained super-enhancer-associated genes by potent TFs.**

a. Hi-C maps at the *ANO1*, *HSP90AA1*, and *PMEPA1* neighboring regions within apparent TADs (highlighted in purple rectangles). The Integrative Genomics Viewer (IGV) views of ChIP-seq enrichment for H3K27ac signals in four representative LNC samples (patient No. 10, 13, 19, and 21) were shown. The TFs potentially bound to the highlighted TAD regions were predicted using HOMER and depicted below.

b. Quantitative real-time PCR analysis of *ANO1*, *HSP90AA1*, and *PMEPA1* expression upon knockdown of 12 gained enhancer-predicted TFs. n=2 biologically independent experiments presented. Source data are provided as a Source Data file.

**Supplementary Table 1.** DNA oligo sequences used for shRNA construction.

| Oligo Name     | Oligo sequence (5'-3')                                                  |
|----------------|-------------------------------------------------------------------------|
| shCtrl-For     | GATCCG <b>ACAAGATGAAGAGCACCA</b> TTCAAGAGATTGGTGTCTTCATCTTGTTTTTTG      |
| shCtrl-Rev     | AATTCAAAA <b>ACAAGATGAAGAGCACCA</b> ATCTCTTGAATTGGTGTCTTCATCTTGTTCG     |
| shSOX2-1-For   | GATCCG <b>AGCTCGCAGACCTACATGAA</b> TTCAAGAGATTTCATGTAGGTCTGCGAGCTTTTTTG |
| shSOX2-1-Rev   | AATTCAAAA <b>AGCTCGCAGACCTACATGAA</b> TCTCTTGAATTTCATGTAGGTCTGCGAGCTCG  |
| shSOX2-2-For   | GATCCG <b>AGAAGGATAAGTACACGCT</b> TTCAAGAGAAAGCGTGTACTTATCCTTCTTTTTTG   |
| shSOX2-2-Rev   | AATTCAAAA <b>AGAAGGATAAGTACACGCT</b> TCTCTTGAAGCGTGTACTTATCCTTCTTCG     |
| shRXRA-1-For   | GATCCG <b>GATTCTCCACCCAGGTGAA</b> TTCAAGAGATTACCTGGGTGGAGAAATCTTTTTTG   |
| shRXRA-1-Rev   | AATTCAAAA <b>GATTCTCCACCCAGGTGAA</b> TCTCTTGAATTACCTGGGTGGAGAAATCCG     |
| shRXRA-2-For   | GATCCG <b>AAGGACTGCCTGATTGACAA</b> TTCAAGAGATTGTCAATCAGGCAGTCTTTTTTG    |
| shRXRA-2-Rev   | AATTCAAAA <b>AAGGACTGCCTGATTGACAA</b> TCTCTTGAATTGTCAATCAGGCAGTCTTCG    |
| shNFE2L2-1-For | GATCCG <b>TGACAGAAGTTGACAATTA</b> TTCAAGAGATAATTGTCAACTTCTGTCATTTTTG    |
| shNFE2L2-1-Rev | AATTCAAAA <b>TGACAGAAGTTGACAATTA</b> TCTCTTGAATAATTGTCAACTTCTGTCAACG    |
| shNFE2L2-2-For | GATCCG <b>GTAAGAAGCCAGATGTTAA</b> TTCAAGAGATTAACATCTGGCTTCTTACTTTTTTG   |
| shNFE2L2-2-Rev | AATTCAAAA <b>GTAAGAAGCCAGATGTTAA</b> TCTCTTGAATTAACATCTGGCTTCTTACCG     |
| shZNF519-1-For | GATCCG <b>CATTCTCAAAGCTTACTCAA</b> TTCAAGAGATTGAGTAAGCTTTGAGAATGTTTTTG  |
| shZNF519-1-Rev | AATTCAAAA <b>CATTCTCAAAGCTTACTCAA</b> TCTCTTGAATTGAGTAAGCTTTGAGAATGCG   |
| shZNF519-2-For | GATCCG <b>CTCTACAGAACCATGTATT</b> TTCAAGAGAAATACATGGTCTGTAGGAGTTTTTG    |
| shZNF519-2-Rev | AATTCAAAA <b>CTCTACAGAACCATGTATT</b> TCTCTTGAATAACATGGTCTGTAGGAGCG      |
| shESRRA-1-For  | GATCCG <b>AGAGGAGTATGTTCTACTAA</b> TTCAAGAGATTAGTAGAACATACTCTCTTTTTTG   |
| shESRRA-1-Rev  | AATTCAAAA <b>AGAGGAGTATGTTCTACTAA</b> TCTCTTGAATTAGTAGAACATACTCTCTCG    |
| shESRRA-2-For  | GATCCG <b>TGAATGCACTGGTGTCTCAT</b> TTCAAGAGATGAGACACCAGTGCATTCATTTTTG   |
| shESRRA-2-Rev  | AATTCAAAA <b>TGAATGCACTGGTGTCTCAT</b> TCTCTTGAATGAGACACCAGTGCATTCAACG   |
| shRELA-1-For   | GATCCG <b>CCTTAATAGTAGGGTAAGTT</b> TTCAAGAGAACTTACCCTACTATTAAGTTTTTG    |
| shRELA-1-Rev   | AATTCAAAA <b>CCTTAATAGTAGGGTAAGTT</b> TCTCTTGAATACTTACCCTACTATTAAGCG    |
| shRELA-2-For   | GATCCG <b>GGATTGAGGAGAAACGTAAA</b> TTCAAGAGATTTACGTTTCTCCTCAATCTTTTTTG  |
| shRELA-2-Rev   | AATTCAAAA <b>GGATTGAGGAGAAACGTAAA</b> TCTCTTGAATTTACGTTTCTCCTCAATCCCG   |
| shTCF4-1-For   | GATCCG <b>ACGAAATCTTCGGAGGACAA</b> TTCAAGAGATTGCTCCTCGAAGATTTCGTTTTTG   |
| shTCF4-1-Rev   | AATTCAAAA <b>ACGAAATCTTCGGAGGACAA</b> TCTCTTGAATTGCTCCTCGAAGATTTCGTCG   |
| shTCF4-2-For   | GATCCG <b>AAAGGAATCTGAATCCGAAA</b> TTCAAGAGATTTCCGATTGAGTTCCTTTTTTG     |
| shTCF4-2-Rev   | AATTCAAAA <b>AAAGGAATCTGAATCCGAAA</b> TCTCTTGAATTTCCGATTGAGTTCCTTCG     |
| shETS1-1-For   | GATCCG <b>TGGAATTACTCACTGATAAA</b> TTCAAGAGATTTATCAGTGAGTAATCCATTTTTTG  |
| shETS1-1-Rev   | AATTCAAAA <b>TGGAATTACTCACTGATAAA</b> TCTCTTGAATTTATCAGTGAGTAATCCACG    |
| shETS1-2-For   | GATCCG <b>CCCTGGGTAAAGACTGCTTT</b> TTCAAGAGAAAGCAGTCTTTACCCAGGGTTTTTG   |
| shETS1-2-Rev   | AATTCAAAA <b>CCCTGGGTAAAGACTGCTTT</b> TCTCTTGAATAAGCAGTCTTTACCCAGGGCG   |
| shSOX12-1-For  | GATCCG <b>ATGGCGGATTACCCGGACTA</b> TTCAAGAGATAGTCCGGTAATCCGCCATTTTTTG   |
| shSOX12-1-Rev  | AATTCAAAA <b>ATGGCGGATTACCCGGACTA</b> TCTCTTGAATAGTCCGGTAATCCGCCATCG    |
| shSOX12-2-For  | GATCCG <b>CTGGGCTTTCTGTCCAGGCT</b> TTCAAGAGAAAGCTGGACAGAAAGCCAGTTTTTG   |
| shSOX12-2-Rev  | AATTCAAAA <b>CTGGGCTTTCTGTCCAGGCT</b> TCTCTTGAAGCTGGACAGAAAGCCAGCG      |
| shNFATC2-1-For | GATCCG <b>CACATCATGTACTGCGAGAA</b> TTCAAGAGATTCTCGCAGTACATGATGTGTTTTTG  |
| shNFATC2-1-Rve | AATTCAAAA <b>CACATCATGTACTGCGAGAA</b> TCTCTTGAATTCTCGCAGTACATGATGTGCG   |
| shNFATC2-2-For | GATCCG <b>CGAGTCCAAAGTTGTGTTA</b> TTCAAGAGATAAACACAACCTTTGGACTCGTTTTTG  |
| shNFATC2-2-Rve | AATTCAAAA <b>CGAGTCCAAAGTTGTGTTA</b> TCTCTTGAATAAACACAACCTTTGGACTCGCG   |
| shIRF2-1-For   | GATCCG <b>CGGTCTGACTTCAACTATA</b> TTCAAGAGATATAGTTGAAGTCAGGACCGTTTTTG   |
| shIRF2-1-Rve   | AATTCAAAA <b>CGGTCTGACTTCAACTATA</b> TCTCTTGAATATAGTTGAAGTCAGGACCGCG    |
| shIRF2-2-For   | GATCCG <b>AGAACGGCTTCTAAGAAAG</b> TTCAAGAGACTTTCTTAGAAGCCGTTCTTTTTTG    |
| shIRF2-2-Rve   | AATTCAAAA <b>AGAACGGCTTCTAAGAAAG</b> TCTCTTGAACCTTCTTAGAAGCCGTTCTCG     |
| shZEB1-1-For   | GATCCG <b>CTCTCTGAAAGAACACATTA</b> TTCAAGAGATAATGTGTTCTTTCAGAGAGTTTTTG  |
| shZEB1-1-Rve   | AATTCAAAA <b>CTCTCTGAAAGAACACATTA</b> TCTCTTGAATAATGTGTTCTTTCAGAGAGCG   |
| shZEB1-2-For   | GATCCG <b>CTACCACTGGATGTAGTAAA</b> TTCAAGAGATTTACTACATCCAGTGGTAGTTTTTG  |
| shZEB1-2-Rve   | AATTCAAAA <b>CTACCACTGGATGTAGTAAA</b> TCTCTTGAATTTACTACATCCAGTGGTAGCG   |

**Supplementary Table 2.** Quantitative real-time PCR primer sequences.

| qPCR primer name (Human) | Primer sequences (5'-to-3') |
|--------------------------|-----------------------------|
| ZEB1-For                 | TTACACCTTTGCATACAGAACCC     |
| ZEB1-Rve                 | TTTACGATTACACCCAGACTGC      |
| GAPDH-For                | GGAGCGAGATCCCTCCAAAAT       |
| GAPDH-Rev                | GGCTGTTGTCATACTTCTCATGG     |
| SOX2-For                 | TGGACAGTTACGCGCACAT         |
| SOX2-Rev                 | CGAGTAGGACATGCTGTAGGT       |
| RXRA-For                 | ATGGACACCAAACATTTCTCTGC     |
| RXRA-Rev                 | GGGAGCTGATGACCGAGAAAG       |
| NFE2L2-For               | TCAGCGACGGAAAGAGTATGA       |
| NFE2L2-Rev               | CCACTGGTTTCTGACTGGATGT      |
| ZNF519-For               | ACTTCTGACCCATTCTCAA         |
| ZNF519-Rev               | CTTATGTCCCTTTAGATGTG        |
| ESRRA-For                | GAGATCACCAAGCGGAGACG        |
| ESRRA-Rev                | ATGAGACACCAGTGCATTAC        |
| RELA-For                 | ATGTGGAGATCATTGAGCAGC       |
| RELA-Rev                 | CCTGGTCTGTGTAGCCATT         |
| TCF4-For                 | CAAGCACTGCCGACTACAATA       |
| TCF4-Rev                 | CCAGGCTGATTCATCCCACTG       |
| ETS1-For                 | GATAGTTGTGATCGCCTCACC       |
| ETS1-Rev                 | GTCCTCTGAGTCGAAGCTGTC       |
| SOX12-For                | AAGAGGCCGATGAACGCATT        |
| SOX12-Rev                | TAGTCCGGGTAATCCGCCAT        |
| NFATC2-For               | GAGCCGAATGCACATAAGGTC       |
| NFATC2-Rve               | CCAGAGAGACTAGCAAGGGG        |
| IRF2-For                 | AATGCTGCCCTATCAGAACG        |
| IRF2-Rve                 | CAGGACCGCATACTCAGGAGA       |
| p21-For                  | TGTCGGTCAGAACCCATGC         |
| p21-Rev                  | AAAGTCGAAGTTCCATCGCTC       |
| PMEPA1-For               | TGTCAGGCAACGGAATCCC         |
| PMEPA1-Rev               | CAGGTACGGATAGGTGGGC         |
| ANO1-For                 | CTGATGCCGAGTGCAAGTATG       |
| ANO1-Rev                 | AGGGCCTCTTGTGATGGTACA       |
| HSP90AA1-For             | GCTTGACCAATGACTGGGAAG       |
| HS90AA1-Rev              | AGCTCCTCACAGTTATCCATGA      |
| SNAI1-For                | TCGGAAGCCTAACTACAGCG        |
| SNAI1-Rev                | AGATGAGCATTGGCAGCGAG        |
| FN1-For                  | CGGTGGCTGTCAAGCAAAG         |
| FN1-Rev                  | AAACCTCGGCTTCTCCATAA        |
| C-MYC-For                | GGCTCCTGGCAAAGGTCA          |
| C-MYC-Rev                | CTGCGTAGTTGTGCTGATGT        |
